# Supplementary material for: Utilizing Quantitative Proteomics to Identify Species-Specific Protein Therapeutic Targets for the Treatment of Leishmaniasis
Source: PubMed Central journal article supplement — ACS Omega. 2022 Apr 4;7(15):12580–8. doi: 10.1021/acsomega.1c05792 (PMC9026083; doi:10.1021/acsomega.1c05792), 2022-04-04
Supplement: ao1c05792_si_001.pdf [file ao1c05792_si_001.pdf]

## Supporting information

**Title:** Utilizing quantitative proteomics to identify species-specific protein therapeutic targets for treatment of leishmaniasis

**Author List:** Sucheewin Krobthong<sup>1,2 †</sup>, Yodying Yingchutrakul<sup>2,3, †</sup>, Pawitrabhorn Samutrjai<sup>4</sup>, Atitaya Hitakarun<sup>5</sup>, Suradej Siripattanapipong<sup>6</sup>, Saovanee Leelayoova<sup>7</sup>, Mathirut Mungthin<sup>7</sup>, Kiattawee Choowongkomon<sup>1,8,\*</sup>

### Affiliations:

<sup>1</sup>Genetic Engineering and Bioinformatics program, Kasetsart University, Bangkok, Thailand; E-mail: sucheewin82@gmail.com

<sup>2</sup>Center for Neuroscience, Faculty of Science, Mahidol University, Bangkok, 10400, Thailand

<sup>3</sup>National Omics Center, NSTDA, Pathum Thani, Thailand; E-mail: yodying.yin@nstda.or.th

<sup>4</sup>Department of Pharmaceutical Sciences, Faculty of Pharmacy, Chiang Mai University, Chiang Mai, Thailand; E-mail: pawitrabhorn.s@cmu.ac.th

<sup>5</sup>Suphanburi Campus Establishment Project, Kasetsart University, Suphan Buri, Thailand; E-mail: tonaor.scmi@gmail.com

<sup>6</sup>Department of Microbiology, Faculty of Science, Mahidol University, Thailand; E-mail: suradej.sir@mahidol.ac.th

<sup>7</sup>Department of Parasitology, Phramongkutklao College of Medicine, Bangkok, Thailand; E-mail: sleelayoova@gmail.com (SL), mathirut@pmk.ac.th (MM)

<sup>8</sup>Department of Biochemistry, Faculty of Science, Kasetsart University, Bangkok, Thailand; E-mail: kiattawee.c@ku.th

†Co-first author, these authors contributed equally to this work.

\*Correspondence: Department of Biochemistry, Faculty of Science, Kasetsart University, 50 Ngam Wong Wan Road, Chatuchak, Bangkok 10900, Thailand. Tel: (+66)2-562-5444 Ext 2046; Fax: (+66)2-561-4627

**Table S1:** The protein list of high confidence data.

| Accession  | Protein name                                                    | q-value |
|------------|-----------------------------------------------------------------|---------|
| A0A3P3Z5D7 | 1_-2-Dihydroxy-3-keto-5-methylthiopentene_dioxygenase           | 0       |
| E9BI74     | 10 kDa heat shock protein, putative                             | 0       |
| A0A640KIV5 | 10 kDa heat shock protein, putative                             | 0       |
| Q25317     | 100 kDa heat shock protein (Hsp100)                             | 0       |
| A0A6J8F523 | 14-3-3_protein_2_putative/GeneDB:LmjF.11.0350                   | 0       |
| A0A3P3ZC87 | 2-hydroxy-3-oxopropionate_reductase                             | 0       |
| E9BUR6     | 2-methoxy-6-polyprenyl-1,4-benzoquinol methylase, mitochondrial | 0       |
| A0A3S5H5X9 | 3-hydroxyacyl-ACP dehydratase, putative                         | 0       |
| A4HVI6     | 40S ribosomal protein S12                                       | 0       |
| E9AZR2     | 40S ribosomal protein S14                                       | 0       |
| A0A640KLV1 | 40S ribosomal protein S19 protein, putative                     | 0       |
| A0A3S7X558 | 40S ribosomal protein S2                                        | 0       |
| E9AGQ8     | 40S ribosomal protein S2                                        | 0       |
| S24E-1     | 40S ribosomal protein S24                                       | 0       |
| A4HAF8     | 40S ribosomal protein S25                                       | 0       |
| A0A1E1J068 | 40S ribosomal protein S26                                       | 0       |
| A0A640KDX9 | 40S ribosomal protein S3, putative                              | 0       |
| A0A640KPK0 | 40S ribosomal protein S33, putative                             | 0       |
| E9BRS2     | 40S ribosomal protein S3a                                       | 0       |
| A4HV06     | 40S ribosomal protein S5                                        | 0       |
| A0A3S7WWY7 | 40S ribosomal protein S6                                        | 0       |
| A0A640KWJ5 | 40S ribosomal protein SA                                        | 0       |
| A0A3P3ZHJ4 | 4E-interacting_protein                                          | 0       |
| A4HSR7     | 5'-3'_exoribonuclease_A_-_putative                              | 0       |
| Q66VD6     | 60S acidic ribosomal protein P0 (Fragment)                      | 0       |
| A4HFR6     | 60S acidic ribosomal protein P0                                 | 0       |
| A0A640KDZ6 | 60S acidic ribosomal protein P2, putative                       | 0       |
| A0A088RTU9 | 60S ribosomal protein L17, putative                             | 0       |
| A0A088RM49 | 60S ribosomal protein L21, putative                             | 0       |
| E9AEK1     | 60S ribosomal protein L30                                       | 0       |
| A0A640KII0 | 60S ribosomal protein L7, putative                              | 0       |
| E9AL63     | 60S ribosomal protein L7a                                       | 0       |
| A0A640KMK9 | 60S ribosomal protein L9, putative                              | 0       |

**Table S1 (cont.):** The protein list of high confidence data.

| Accession  | Protein name                                                                  | q-value |
|------------|-------------------------------------------------------------------------------|---------|
| A4HWD9     | 60S_acidic_ribosomal_protein_-_putative                                       | 0       |
| A0A6J8FAU2 | 60S_acidic_ribosomal_protein_P2/GeneDB:LmjF.15.12 03/GeneDB:LmjF.15.1207      | 0       |
| A0A3P3YXI5 | 60S_ribosomal_protein_L10                                                     | 0       |
| RPL10a     | 60S_ribosomal_protein_L10a_-_putative                                         | 0       |
| E9AHW0     | 60S_ribosomal_protein_L12_-_putative                                          | 0       |
| A0A504XPH7 | 60S_ribosomal_protein_L13a_putative/GeneDB:LmjF.15.0200/GeneDB:LmjF.34.0860   | 0       |
| A0A3S7WVI6 | ABC transport system ATP-binding protein, putative                            | 0       |
| E9BD89     | ACB domain-containing protein                                                 | 0       |
| A0A640KJH1 | ACB domain-containing protein                                                 | 0       |
| A0A088RXI0 | Acetyl-CoA carboxylase                                                        | 0       |
| A0A6J8FBI1 | Acetyl-coenzyme A synthetase                                                  | 0       |
| A4H4X2     | Acetylmithine deacetylase                                                     | 0       |
| A0A3P3Z3G8 | Aconitate hydratase                                                           | 0       |
| C6KJC6     | Actin                                                                         | 0       |
| D3K115     | Adenosylhomocysteinase                                                        | 0       |
| Q4Q124     | Adenosylhomocysteinase                                                        | 0       |
| A0A088S2U2 | Adenosylhomocysteinase                                                        | 0       |
| ASL        | Adenylosuccinate lyase                                                        | 0       |
| ARL-3A     | ADP-ribosylation factor family protein                                        | 0       |
| A4HVW1     | AhpC/TSA_family/Thioredoxin-like_-_putative                                   | 0       |
| A0A3Q8ICG8 | Alanine--tRNA ligase                                                          | 0       |
| E9AVY6     | Alanine--tRNA ligase                                                          | 0       |
| E9BBA2     | Alba domain-containing protein                                                | 0       |
| E9AP69     | Alba domain-containing protein                                                | 0       |
| A0A088S825 | Alba domain-containing protein                                                | 0       |
| A0A640KCX7 | Alba domain-containing protein                                                | 0       |
| A4IA34     | Alba_-_putative                                                               | 0       |
| A0A088RR95 | Aldose 1-epimerase-like protein                                               | 0       |
| A0A3P3Z0Z0 | Alpha_tubulin                                                                 | 0       |
| A0A6J8FMZ7 | Amastin-like_surface_protein_putative/GeneDB:LmjF.34.0960/GeneDB:LmjF.34.1080 | 0       |
| A0A504X048 | Amidohydrolase family protein                                                 | 0       |
| E9BMF8     | Amino acid permease, putative                                                 | 0       |

**Table S1 (cont.):** The protein list of high confidence data.

| Accession  | Protein name                                                                                       | q-value |
|------------|----------------------------------------------------------------------------------------------------|---------|
| A0A504X1P4 | Amino_acid_transporter_aATP11_putative/GeneDB:LmjF.31.0330/GeneDB:LmjF.31.0340/GeneDB:LmjF.31.0350 | 0       |
| A0A088S8W7 | Aminoacylase, putative                                                                             | 0       |
| A0A640KUD8 | Aminoacylase, putative                                                                             | 0       |
| E9BSB0     | Aminopeptidase P, putative                                                                         | 0       |
| E9BPK8     | Aminopeptidase, putative                                                                           | 0       |
| A0A6J8F609 | Aminopeptidase_putative/GeneDB:LmjF.11.0620/GeneDB:LmjF.11.0630                                    | 0       |
| A0A3P3ZEJ5 | AMMECR1                                                                                            | 0       |
| Q4Q4X1     | AMPK1_CBM domain-containing protein                                                                | 0       |
| A4HHC0     | ANK_REP_REGION domain-containing protein                                                           | 0       |
| A0A640KL91 | Arginine--tRNA ligase                                                                              | 0       |
| E9BJ55     | Arginyl-tRNA synthetase                                                                            | 0       |
| A0A088RW67 | Arginyl-tRNA synthetase                                                                            | 0       |
| A0A504XR61 | Aspartate carbamoyltransferase                                                                     | 0       |
| A0A1E1IXE4 | Aspartate carbamoyltransferase                                                                     | 0       |
| A0A640KCH7 | Aspartate carbamoyltransferase                                                                     | 0       |
| A0A504XWI4 | Aspartate--ammonia ligase                                                                          | 0       |
| A0A088RMY9 | ATG8/AUT7/APG8/PAZ2, putative (Fragment)                                                           | 0       |
| A0A640KQ71 | ATP binding protein-like protein                                                                   | 0       |
| E9AXJ6     | ATP synthase subunit beta                                                                          | 0       |
| A4ICB6     | ATP_synthase_delta_(OSCP)_subunit_-_putative                                                       | 0       |
| A0A1E1J4H7 | ATP-binding cassette protein subfamily F, member 3, putative                                       | 0       |
| pfk        | ATP-dependent 6-phosphofructokinase                                                                | 0       |
| A0A088RKP9 | ATP-dependent DEAD/H RNA helicase, putative                                                        | 0       |
| A0A3Q8IEU7 | ATP-dependent DEAD-box RNA helicase, putative                                                      | 0       |
| E9BSI5     | ATP-dependent RNA helicase, putative                                                               | 0       |
| A0A504XCK1 | Axonemal dynein light chain family protein                                                         | 0       |
| A0A640KHW1 | Beta propeller protein, putative                                                                   | 0       |
| Q1PCI3     | Beta tubulin (Fragment)                                                                            | 0       |
| A0A3S7X6J0 | Beta tubulin                                                                                       | 0       |
| Q27359     | Beta-tubulin (Fragment)                                                                            | 0       |
| A4H4P8     | Bifunctional dihydrofolate reductase-thymidylate synthase                                          | 0       |
| A0A6J8FIW1 | Biotin/lipoate_protein_ligase-like_protein/GeneDB:LmjF.31.1070                                     | 0       |
| E9ATX7     | Branchpoint-bridging protein                                                                       | 0       |

**Table S1 (cont.):** The protein list of high confidence data.

| Accession  | Protein name                                                       | q-value |
|------------|--------------------------------------------------------------------|---------|
| A0A3S7X0S6 | BRO1-like domain/ALIX V-shaped domain binding to HIV, putative     | 0       |
| A0A504XCG6 | BT1 family protein                                                 | 0       |
| A0A504XC61 | C3H1-type domain-containing protein                                | 0       |
| A0A088RU13 | C3H1-type domain-containing protein                                | 0       |
| A0A504X9Z4 | Calcium-transporting ATPase                                        | 0       |
| CALA2      | Calmodulin                                                         | 0       |
| E9AFL3     | Calmodulin-like protein                                            | 0       |
| A4HTS8     | Calmodulin-like_protein_containing_EF_hand_domain                  | 0       |
| A0A504X8T1 | Calpain cysteine protease family protein                           | 0       |
| A0A504XGG4 | Calpain cysteine protease family protein                           | 0       |
| A0A3Q8IHF4 | Calpain-like cysteine peptidase, putative                          | 0       |
| A0A3Q8ID62 | Calpain-like cysteine peptidase, putative                          | 0       |
| A0A088SCJ7 | Calpain-like cysteine peptidase, putative                          | 0       |
| A0A088RWU9 | Calpain-like cysteine peptidase, putative                          | 0       |
| A0A640KJF2 | Calpain-like cysteine peptidase, putative                          | 0       |
| A0A3S7WSA3 | Carboxypeptidase Taq (M32) metallopeptidase family protein         | 0       |
| A0A3Q8IU74 | Carboxypeptidase Taq (M32) metallopeptidase family protein         | 0       |
| A0A3Q8IBW2 | Carboxypeptidase, putative                                         | 0       |
| A0A1E1IRP2 | Carboxypeptidase, putative,metallo-peptidase,Clan MA(E), family 32 | 0       |
| Q9GQN7     | Cathepsin B cysteine protease                                      | 0       |
| A4H9G1     | C-CAP/cofactor C-like domain-containing protein                    | 0       |
| E9BJ47     | CCT-beta                                                           | 0       |
| Q4Q5I2     | CCT-epsilon                                                        | 0       |
| A0A1E1J6I2 | CCT-eta                                                            | 0       |
| A0A3P3ZJW6 | CCT-theta                                                          | 0       |
| A4ICD2     | CCT-theta                                                          | 0       |
| E9AUC7     | CCT-theta                                                          | 0       |
| A0A3P3YYK6 | Centrin                                                            | 0       |
| A0A1E1IWK2 | Centrin, putative,Ca2-binding EF-hand protein                      | 0       |
| A0A088S3L3 | Chaperone protein DNAj, putative                                   | 0       |
| A0A640KQY3 | Chaperonin containing t-complex protein, putative                  | 0       |
| A0A3Q8IVZ2 | Chaperonin GroL                                                    | 0       |
| A0A3Q8IJA5 | Chaperonin HSP60, mitochondrial                                    | 0       |
| A0A504XXF5 | Citrate synthase                                                   | 0       |

**Table S1 (cont.):** The protein list of high confidence data.

| Accession  | Protein name                                                                   | q-value |
|------------|--------------------------------------------------------------------------------|---------|
| A4I3Z5     | Coatomer subunit gamma                                                         | 0       |
| E9BKJ8     | Cofilin-like protein                                                           | 0       |
| A0A088RVR1 | Cofilin-like protein                                                           | 0       |
| A4HAY7     | Contig, possible fusion of chromosomes 20 and 34                               | 0       |
| A0A3P3ZER2 | Cop-coated vesicle membrane protein p24 precursor                              | 0       |
| A0A504XY59 | Cornifin (SPRR) family protein                                                 | 0       |
| A0A504X0S6 | Cornifin (SPRR) family protein                                                 | 0       |
| A0A504XQ11 | CS domain family protein                                                       | 0       |
| E9BNZ2     | CS domain-containing protein                                                   | 0       |
| A0A504WUV1 | CS domain-containing protein                                                   | 0       |
| A4IBY7     | CS_domain_containing_protein_-_putative                                        | 0       |
| A0A640KSW6 | Cystathionine beta-lyase-like protein                                          | 0       |
| E9ALZ5     | Cysteine peptidase C (CPC)                                                     | 0       |
| A0A4D5YID9 | Cysteine protease (Fragment)                                                   | 0       |
| A0A4D5YJB0 | Cysteine protease (Fragment)                                                   | 0       |
| Q9TWN9     | Cysteine protease group C (Fragment)                                           | 0       |
| A0A504XLA4 | Cytochrome b5-like Heme/Steroid binding domain family protein                  | 0       |
| A3RGM1     | Cytochrome P450-like protein                                                   | 0       |
| A0A3P3YYF9 | Cytokine-induced_anti-apoptosis_inhibitor_1                                    | 0       |
| A0A3S7X470 | Cytoskeleton-associated protein CAP5.5, putative                               | 0       |
| A0A504X5X1 | DEAD/DEAH box helicase family protein                                          | 0       |
| A4HRV7     | DEAD/DEAH_box_helicase/Type_III_restriction_enzyme_-_res_subunit_-_putative    | 0       |
| Q4QHL1     | Dehydrogenase-like protein                                                     | 0       |
| A0A3Q8IK74 | Developmentally regulated GTP-binding protein 1, putative                      | 0       |
| A0A640KUM4 | Dihydrolipoamide acetyltransferase component of pyruvate dehydrogenase complex | 0       |
| E9BF46     | Dihydrolipoamide acetyltransferaselike protein                                 | 0       |
| GCVL-2     | Dihydrolipoyl dehydrogenase                                                    | 0       |
| A0A504XW31 | Dipeptidyl peptidase 3                                                         | 0       |
| Q9U6N3     | DNA polymerase                                                                 | 0       |
| A0A504XJQ5 | Domain found in IF2B/IF5 family protein                                        | 0       |
| A4HTN6     | Dpy-30_motif_containing_protein_-_putative                                     | 0       |
| A0A504X1D9 | Dullard-like phosphatase domain protein                                        | 0       |
| A0A504XPH1 | Dynamin central region family protein                                          | 0       |
| A0A640KBF2 | Dynein heavy chain, putative                                                   | 0       |

**Table S1 (cont.):** The protein list of high confidence data.

| Accession  | Protein name                                                                                                                                                                  | q-value |
|------------|-------------------------------------------------------------------------------------------------------------------------------------------------------------------------------|---------|
| A4IDJ0     | Dynein light chain                                                                                                                                                            | 0       |
| A0A088S0R4 | Dynein light chain roadblock                                                                                                                                                  | 0       |
| A0A640KDZ7 | Dynein light chain roadblock                                                                                                                                                  | 0       |
| A0A640KIC6 | Ecotin, putative                                                                                                                                                              | 0       |
| A0A1E1ISJ7 | Elongation factor 1-alpha                                                                                                                                                     | 0       |
| eEF1B      | Elongation factor 1-beta                                                                                                                                                      | 0       |
| A0A640KZX5 | Elongation factor 2                                                                                                                                                           | 0       |
| A0A1E1J726 | Elongation factor G, mitochondrial                                                                                                                                            | 0       |
| A0A3S7WQT0 | Elongation factor Tu GTP binding domain family protein                                                                                                                        | 0       |
| A0A3Q8I8H5 | Elongation factor-1 gamma                                                                                                                                                     | 0       |
| A0A6J8FBD6 | Elongation_factor_1-alpha/GeneDB:LmjF.17.0080/Gen<br>eDB:LmjF.17.0081/GeneDB:LmjF.17.0082/GeneDB:LmjF.17.0083/Ge<br>neDB:LmjF.17.0084/GeneDB:LmjF.17.0085/GeneDB:LmjF.17.0086 | 0       |
| A4I1M5     | Enoyl-CoA_reductase_-_putative                                                                                                                                                | 0       |
| E9BCL9     | Eukaryotic translation initiation factor 1A, putative                                                                                                                         | 0       |
| A0A640KHX9 | Eukaryotic translation initiation factor 1A, putative                                                                                                                         | 0       |
| A0A504XBY2 | Eukaryotic translation initiation factor 2 alpha subunit family protein                                                                                                       | 0       |
| A0A504XM84 | Eukaryotic translation initiation factor 3 subunit 8 N-terminus family protein                                                                                                | 0       |
| A0A3Q8IGX0 | Eukaryotic translation initiation factor 3 subunit E                                                                                                                          | 0       |
| A0A1E1J905 | Eukaryotic translation initiation factor 3 subunit L                                                                                                                          | 0       |
| E9AXF0     | Eukaryotic translation initiation factor 5A                                                                                                                                   | 0       |
| A4HLY5     | Eukaryotic translation initiation factor 5B                                                                                                                                   | 0       |
| A4HWL7     | Eukaryotic_translation_initiation_factor_4_gamma_type_2_-_putative                                                                                                            | 0       |
| A0A640KDS6 | Exoribonuclease 2, putative                                                                                                                                                   | 0       |
| A0A640KLN7 | FACT complex subunit                                                                                                                                                          | 0       |
| A0A3P3ZGN8 | FAD:protein FMN transferase                                                                                                                                                   | 0       |
| A4IB12     | FAD:protein FMN transferase                                                                                                                                                   | 0       |
| E9BH33     | Fatty acyl-CoA reductase                                                                                                                                                      | 0       |
| A4HD14     | Fer2_3 domain-containing protein                                                                                                                                              | 0       |
| E9BE05     | Fibrillarin, putative                                                                                                                                                         | 0       |
| A4HVG6     | Flagellar_radial_spoke_protein_-_putative                                                                                                                                     | 0       |
| A0A640KBP8 | Folate/biopterin transporter, putative                                                                                                                                        | 0       |
| A0A504XA96 | Fructose-bisphosphatase                                                                                                                                                       | 0       |
| A0A3P3ZI57 | Fructose-bisphosphate aldolase                                                                                                                                                | 0       |

**Table S1 (cont.):** The protein list of high confidence data.

| Accession  | Protein name                                                   | q-value |
|------------|----------------------------------------------------------------|---------|
| A0A504X5D8 | Fructose-bisphosphate aldolase                                 | 0       |
| A4HHJ6     | Fumarate hydratase                                             | 0       |
| fh         | Fumarate hydratase                                             | 0       |
| E9ACH4     | FYVE-type domain-containing protein                            | 0       |
| E9AJR2     | FYVE-type domain-containing protein                            | 0       |
| A0A5B8YY65 | Glucose-6-phosphate isomerase (Fragment)                       | 0       |
| A0A3P3ZB81 | Glutamate dehydrogenase                                        | 0       |
| E9AD58     | Glutaredoxin-like protein                                      | 0       |
| A0A1E1J280 | Glyceraldehyde-3-phosphate dehydrogenase                       | 0       |
| A0A6J8FJH8 | Glycerol-3-phosphate dehydrogenase                             | 0       |
| GCVH       | Glycine cleavage system H protein                              | 0       |
| A4I3V1     | Glycoprotein_96-92_-_putative                                  | 0       |
| gGAPDH     | Glycosomal glyceraldehyde 3-phosphate dehydrogenase (Fragment) | 0       |
| E9AFJ4     | Glycosomal membrane protein                                    | 0       |
| A0A6L0WUF2 | GRIP_domain_containing_protein_-_putative                      | 0       |
| A0A504X9C5 | GrpE family protein                                            | 0       |
| A0A3P3ZCE0 | GrpE protein homolog                                           | 0       |
| E9ALY9     | Guanine deaminase                                              | 0       |
| A0A504XRT1 | Guanine nucleotide-binding protein subunit beta-like protein   | 0       |
| A0A504XPX7 | Guanine nucleotide-binding protein subunit beta-like protein   | 0       |
| A0A504XFL7 | Guanine nucleotide-binding protein subunit beta-like protein   | 0       |
| A0A6J8FCB7 | Guanine nucleotide-binding protein subunit beta-like protein   | 0       |
| A0A1E1J3L2 | Guanine nucleotide-binding protein subunit beta-like protein   | 0       |
| E9AZ28     | Guanine nucleotide-binding protein subunit beta-like protein   | 0       |
| Q9GUB0     | Guanine nucleotide-binding protein subunit beta-like protein   | 0       |
| E9BMP8     | H(+)-exporting diphosphatase                                   | 0       |
| A0A640KTSS | H(+)-transporting two-sector ATPase                            | 0       |
| HSP70      | Heat shock 70 kDa protein (Fragment)                           | 0       |
| A0A3Q8IEX7 | Heat shock 70-related protein 1, mitochondrial, putative       | 0       |
| HSP70      | Heat shock protein 70 (Fragment)                               | 0       |
| C5MKJ9     | Heat shock protein 70 (Fragment)                               | 0       |
| M4T8X9     | Heat shock protein 70 (Fragment)                               | 0       |
| E9BID4     | Heat shock protein 70-related protein                          | 0       |
| E9AYA3     | Heat shock protein 70-related protein                          | 0       |



**Table S1 (cont.):** The protein list of high confidence data.

| Accession   | Protein name                                                                                                                                                                 | q-value |
|-------------|------------------------------------------------------------------------------------------------------------------------------------------------------------------------------|---------|
| A0A1W5T9L2  | Heat shock protein 83                                                                                                                                                        | 0       |
| A0A640K WG2 | Heat shock protein 83                                                                                                                                                        | 0       |
| A0A088RU16  | Heat shock protein DNAJ, putative                                                                                                                                            | 0       |
| A0A640KSJ7  | Heat shock protein, putative                                                                                                                                                 | 0       |
| A0A3P3ZAP6  | Heat_shock_70-related_protein_1                                                                                                                                              | 0       |
| A4I3J9      | Heat_shock_70-related_protein_1_-_mitochondrial_precursor_-_putative                                                                                                         | 0       |
| A0A6J8FGP5  | Heat_shock_70-related_protein_1_mitochondrial_pre<br>cursor_putative/GeneDB:LmjF.30.2460/GeneDB:LmjF.30.2470/Gen<br>eDB:LmjF.30.2480/GeneDB:LmjF.30.2490/GeneDB:LmjF.30.2550 | 0       |
| A0A3P3Z3I6  | Heat_shock_protein_110                                                                                                                                                       | 0       |
| A0A6J8FKP5  | Heat_shock_protein_83-17/GeneDB:LmjF.33.0365                                                                                                                                 | 0       |
| E9AGY8      | Heat_shock_protein_DNAJ_-_putative                                                                                                                                           | 0       |
| A4I341      | Heat_shock_protein_DNAJ_-_putative                                                                                                                                           | 0       |
| A0A3S7X5C8  | HECT-domain (Ubiquitin-transferase), putative                                                                                                                                | 0       |
| E9ALZ2      | High mobility group protein homolog tdp-1,putative                                                                                                                           | 0       |
| A0A3Q8IHR2  | Histidine--tRNA ligase                                                                                                                                                       | 0       |
| G3G3W8      | Histone H2A                                                                                                                                                                  | 0       |
| A0A088RLY0  | Histone H2A                                                                                                                                                                  | 0       |
| A0A381MG06  | Histone H2B                                                                                                                                                                  | 0       |
| A4H7X1      | Histone H4                                                                                                                                                                   | 0       |
| Q4JHM4      | Histone H4                                                                                                                                                                   | 0       |
| Q4QFI3      | Histone H4                                                                                                                                                                   | 0       |
| E9ASB9      | Histone H4                                                                                                                                                                   | 0       |
| A0A6J8FPL9  | Holliday-junction_resolvase-like_of_SPT6/SH2_doma<br>in_containing_protein_putative/Pfam:PF14639/Pfam:PF14633                                                                | 0       |
| A0A3P3ZJE3  | HslVU_complex_proteolytic_subunit                                                                                                                                            | 0       |
| A0A504XPS1  | Hsp70 family protein                                                                                                                                                         | 0       |
| A0A504Y543  | Hsp70 family protein                                                                                                                                                         | 0       |
| A0A504XC31  | Hsp70 family protein                                                                                                                                                         | 0       |
| HSP83       | HSP83 protein                                                                                                                                                                | 0       |
| A0A504Y5J2  | Hsp90 family protein                                                                                                                                                         | 0       |
| A0A504Y1Y6  | Hydroxymethylglutaryl-coenzyme A synthase N terminal family protein                                                                                                          | 0       |
| A0A1E1IXW5  | Hypothetical predicted multi-pass transmembrane protein                                                                                                                      | 0       |
| A0A3P3YZF9  | Hypothetical_protein                                                                                                                                                         | 0       |
| A0A3P3Z4X3  | Hypothetical_protein                                                                                                                                                         | 0       |

**Table S1 (cont.):** The protein list of high confidence data.

| Accession  | Protein name                                      | q-value |
|------------|---------------------------------------------------|---------|
| A0A3P3Z8E4 | Hypothetical_protein                              | 0       |
| A4HRQ0     | Hypothetical_protein_-_conserved                  | 0       |
| A4HS97     | Hypothetical_protein_-_conserved                  | 0       |
| A0A6L0XKU2 | Hypothetical_protein_-_conserved                  | 0       |
| A0A6L0XD14 | Hypothetical_protein_-_conserved                  | 0       |
| A4I2D7     | Hypothetical_protein_-_conserved                  | 0       |
| A4I2S2     | Hypothetical_protein_-_conserved                  | 0       |
| A4I4H4     | Hypothetical_protein_-_conserved                  | 0       |
| A4I8V4     | Hypothetical_protein_-_conserved                  | 0       |
| A4IAR5     | Hypothetical_protein_-_conserved                  | 0       |
| A0A3S7X729 | Hypothetical_protein_conserved                    | 0       |
| A0A3S7WPX1 | Hypothetical_protein_conserved                    | 0       |
| A0A3S7WYM0 | Hypothetical_protein_conserved                    | 0       |
| A0A504XVG4 | Hypothetical_protein_conserved                    | 0       |
| A0A3S7X7R9 | Hypothetical_protein_conserved                    | 0       |
| A0A504XRH6 | Hypothetical_protein_conserved                    | 0       |
| A0A3S5H5H8 | Hypothetical_protein_conserved                    | 0       |
| A0A3Q8IH91 | Hypothetical_protein_conserved                    | 0       |
| A0A504XV02 | Hypothetical_protein_conserved                    | 0       |
| A0A504YBN6 | Hypothetical_protein_conserved                    | 0       |
| A0A504XY93 | Hypothetical_protein_conserved                    | 0       |
| A0A6J8F5B6 | Hypothetical_protein_conserved                    | 0       |
| A0A6J8FB09 | Hypothetical_protein_conserved                    | 0       |
| A0A6J8FEJ1 | Hypothetical_protein_conserved                    | 0       |
| A0A6J8FEY8 | Hypothetical_protein_conserved                    | 0       |
| A0A6J8FPS1 | Hypothetical_protein_conserved                    | 0       |
| A0A6J8FED1 | I/6_autoantigen-like_protein/GeneDB:LmjF.22.1460  | 0       |
| A0A1E1J646 | IgE-dependent histamine-releasing factor,putative | 0       |
| E9AWZ6     | IgE-dependent histamine-releasing factor,putative | 0       |
| A0A075IY05 | Isocitrate dehydrogenase (NADP(+)) (Fragment)     | 0       |
| A4I994     | Isocitrate dehydrogenase [NADP]                   | 0       |
| ICD        | Isocitrate dehydrogenase [NADP]                   | 0       |
| E9BUU4     | Isoleucyl-tRNA synthetase                         | 0       |
| A0A1E1J9X4 | Isoleucyl-tRNA synthetase                         | 0       |

**Table S1 (cont.):** The protein list of high confidence data.

| Accession  | Protein name                                                                                       | q-value |
|------------|----------------------------------------------------------------------------------------------------|---------|
| idi1       | Isopentenyl-pyrophosphate isomerase                                                                | 0       |
| A0A1E1IZK6 | Isovaleryl-coA dehydrogenase, putative                                                             | 0       |
| A0A504XIF1 | Kinesin motor domain family protein                                                                | 0       |
| A0A504Y557 | Kinesin motor domain family protein                                                                | 0       |
| A0A6J8FAZ3 | Kinesin_K39_putative/GeneDB:LmjF.14.1100/GeneDB:LmjF.14.1110/GeneDB:LmjF.14.1120                   | 0       |
| A0A504X8P0 | Kinesin-like protein                                                                               | 0       |
| A0A504XYS6 | Kinesin-like protein                                                                               | 0       |
| A0A088RWH6 | Kinesin-like protein                                                                               | 0       |
| A0A504XA70 | Kinetoplastid membrane protein 11 family protein                                                   | 0       |
| KMP-11     | Kinetoplastid membrane protein 11                                                                  | 0       |
| O77413     | Kinetoplastid membrane protein-11                                                                  | 0       |
| A0A3Q8IDD1 | Leucine-rich repeat protein, putative                                                              | 0       |
| A0A1E1J8Z7 | Leucyl-tRNA synthetase                                                                             | 0       |
| E9APD4     | Leucyl-tRNA synthetase                                                                             | 0       |
| A0A640KLW3 | Lipophosphoglycan biosynthetic protein, putative                                                   | 0       |
| E9BAG4     | LsmAD domain-containing protein                                                                    | 0       |
| Q4QHA3     | LsmAD domain-containing protein                                                                    | 0       |
| A0A504X419 | Malate dehydrogenase                                                                               | 0       |
| A0A3S7WVE3 | Malate dehydrogenase                                                                               | 0       |
| cMDH       | Malate dehydrogenase                                                                               | 0       |
| A4I9I3     | Malate dehydrogenase                                                                               | 0       |
| A0A5B8YYF2 | Mannose phosphate isomerase (Fragment)                                                             | 0       |
| A0A3P3ZG54 | Metallo-peptidase                                                                                  | 0       |
| A0A640KCB4 | Metallo-peptidase, clan MF, Family M17                                                             | 0       |
| A0A1E1IYD9 | Methenyltetrahydrofolate cyclohydrolase                                                            | 0       |
| A4I2C8     | Methyltransferase_domain_containing_protein_-_putative                                             | 0       |
| A0A3S5H742 | Mitochondrial carrier protein, putative                                                            | 0       |
| A0A640KVE8 | Mitochondrial phosphate transporter, putative                                                      | 0       |
| E9APB1     | Mitochondrial processing peptidase alpha subunit,putative (Metallo-peptidase, clan me, family m16) | 0       |
| A0A640KJ87 | Mitochondrial RNA binding protein 1                                                                | 0       |
| A4ZZ67     | Mitochondrial tryparedoxin peroxidase                                                              | 0       |
| E9BQ78     | Mitogen activated protein kinase, putative                                                         | 0       |

**Table S1 (cont.):** The protein list of high confidence data.

| Accession  | Protein name                                                                                     | q-value |
|------------|--------------------------------------------------------------------------------------------------|---------|
| A0A504XA36 | MORN repeat family protein                                                                       | 0       |
| A0A451EJM4 | Multifunctional fusion protein                                                                   | 0       |
| A5JV95     | N(1),N(8)-bis(glutathionyl)spermidine reductase                                                  | 0       |
| E9AP13     | NADH:flavin oxidoreductase/NADH oxidase,putative                                                 | 0       |
| E9BCE5     | NAD-specific glutamate dehydrogenase                                                             | 0       |
| E9AQA0     | NAD-specific glutamate dehydrogenase                                                             | 0       |
| NAC        | Nascent polypeptide associated complex homologue, alpha chain                                    | 0       |
| A4HS73     | Nascent polypeptide associated complex subunit-like protein, copy 1                              | 0       |
| A0A640K7Z8 | Nascent polypeptide associated complex subunit-like protein, copy 1                              | 0       |
| A0A3S5H6R4 | N-inal_conserved_domain_of_Nudc./CS_domain_containing_protein_putative/Pfam:PF14050/Pfam:PF04969 | 0       |
| A0A504X8T9 | NOT2 / NOT3 / NOT5 family protein                                                                | 0       |
| A0A6J8FHZ9 | Nuclear_segregation_protein_putative/GeneDB:LmjF. 32.0020                                        | 0       |
| A0A6J8FAJ3 | Nuclear_transport_factor_2_(NTF2)_domain_containing_protein_putative/Pfam:PF02136                | 0       |
| A0A3S5H6F4 | Nucleolar protein 56, putative                                                                   | 0       |
| A0A1E1IQR1 | Nucleolar protein, putative                                                                      | 0       |
| A0A1E1J450 | Nucleoside diphosphate kinase                                                                    | 0       |
| Q9U1E1     | Nucleoside diphosphate kinase                                                                    | 0       |
| M1LHN7     | Nucleoside hydrolase-like protein (Fragment)                                                     | 0       |
| A4I6V2     | Nucleosome assembly protein-like protein                                                         | 0       |
| A4HY66     | Nucleosome_assembly_protein_-_putative                                                           | 0       |
| A0A640KI23 | Orotate phosphoribosyltransferase                                                                | 0       |
| A0A1E1J1N8 | p22 protein, putative                                                                            | 0       |
| E9B894     | Paraflagellar rod component par4, putative                                                       | 0       |
| A0A504XQ10 | Paraflagellar rod family protein                                                                 | 0       |
| A0A640KM90 | Paraflagellar rod protein 1D, putative                                                           | 0       |
| A4H8S1     | Paraflagellar rod protein 2C                                                                     | 0       |
| A4I8S7     | Paraflagellar_rod_component_-_putative                                                           | 0       |
| A0A6J8FUN4 | Paraflagellar_rod_component_putative/GeneDB:LmjF. 36.4230                                        | 0       |
| A0A3S7WWF6 | PCI domain family protein                                                                        | 0       |
| A0A3S7X6U2 | Peptidase M20/M25/M40 family protein                                                             | 0       |
| A0A3S7X4P6 | Peptidase m20/m25/m40 family-like protein                                                        | 0       |
| A0A504X3M7 | Peptidyl-prolyl cis-trans isomerase                                                              | 0       |

**Table S1 (cont.):** The protein list of high confidence data.

| Accession  | Protein name                                                                    | q-value |
|------------|---------------------------------------------------------------------------------|---------|
| E9B400     | Peptidyl-prolyl cis-trans isomerase                                             | 0       |
| A0A640K8J5 | Peptidyl-prolyl cis-trans isomerase                                             | 0       |
| A0A640KJ12 | Peptidyl-prolyl cis-trans isomerase                                             | 0       |
| A4HYI1     | Peptidylprolyl isomerase                                                        | 0       |
| A0A3S7WV15 | Phenylalanyl-tRNA synthetase beta subunit                                       | 0       |
| Q4QDB1     | Phenylalanyl-tRNA synthetase beta subunit                                       | 0       |
| A0A504XFJ1 | Phosphoenolpyruvate carboxykinase (ATP)                                         | 0       |
| E9AZ83     | Phosphoenolpyruvate carboxykinase (ATP)                                         | 0       |
| A0A504Y6H2 | Phosphoglucomutase/phosphomannomutase, alpha/beta/alpha domain I family protein | 0       |
| A0A5B8YY82 | Phosphogluconate dehydrogenase (NADP(+)-dependent, decarboxylating) (Fragment)  | 0       |
| A0A5B8YY94 | Phosphogluconate dehydrogenase (NADP(+)-dependent, decarboxylating) (Fragment)  | 0       |
| PGKC       | Phosphoglycerate kinase, glycosomal                                             | 0       |
| A0A3Q8IWN1 | Phosphoglycerate mutase (2,3-diphosphoglycerate-independent)                    | 0       |
| pgam       | Phosphoglycerate mutase (2,3-diphosphoglycerate-independent)                    | 0       |
| PMM        | Phosphomannomutase                                                              | 0       |
| pmm        | Phosphomannomutase                                                              | 0       |
| A0A5B8Z0A1 | Phosphopyruvate hydratase (Fragment)                                            | 0       |
| B3VA17     | Phosphopyruvate hydratase                                                       | 0       |
| A0A1E11RW0 | Phosphopyruvate hydratase                                                       | 0       |
| A0A640KBT1 | Phosphopyruvate hydratase                                                       | 0       |
| A0A1E11VQ5 | Phosphotransferase                                                              | 0       |
| A0A3S7WWK3 | Plectin, putative                                                               | 0       |
| A0A640KVJ7 | Poly(A) binding protein, putative                                               | 0       |
| A0A1E11XL9 | Poly(A)-binding protein, putative                                               | 0       |
| PABP2      | Polyadenylate-binding protein                                                   | 0       |
| A0A504XKP2 | Polyadenylate-binding protein                                                   | 0       |
| E9AXF3     | PPM-type phosphatase domain-containing protein                                  | 0       |
| PCNA       | Proliferating cell nuclear antigen                                              | 0       |
| A0A640KE42 | Proliferating cell nuclear antigen                                              | 0       |
| A7XAB0     | Prolyl oligopeptidase                                                           | 0       |
| A0A3Q8IJI4 | Prolyl oligopeptidase                                                           | 0       |
| A0A640KG82 | Proteasome alpha 5 subunit, putative                                            | 0       |

**Table S1 (cont.):** The protein list of high confidence data.

| Accession  | Protein name                                             | q-value |
|------------|----------------------------------------------------------|---------|
| A0A088RVV0 | Proteasome alpha 7 subunit, putative                     | 0       |
| A0A640KWC7 | Proteasome regulatory ATPase subunit                     | 0       |
| E9AZ51     | Proteasome regulatory non-ATP-ase subunit 3,putative     | 0       |
| A0A088RH76 | Proteasome regulatory non-ATPase subunit 6, putative     | 0       |
| A0A640KV33 | Proteasome regulatory non-ATP-ase subunit 8, putative    | 0       |
| A0A640KLP7 | Proteasome regulatory non-ATPase subunit, putative       | 0       |
| 91E11      | Proteasome subunit alpha type                            | 0       |
| Q4QH56     | Proteasome subunit alpha type                            | 0       |
| Q4QC13     | Proteasome subunit alpha type                            | 0       |
| E9AST1     | Proteasome subunit alpha type                            | 0       |
| A0A088RSS0 | Proteasome subunit alpha type                            | 0       |
| A0A088S266 | Proteasome subunit alpha type                            | 0       |
| A0A3Q8IY4  | Proteasome subunit beta                                  | 0       |
| A0A6J8FFT5 | Proteasome_alpha_7_subunit_putative/GeneDB:LmjF.2 7.0190 | 0       |
| A4HYC9     | Proteasome_regulatory_non-ATP-ase_subunit_9_-_putative   | 0       |
| E9BV84     | Protein disulfide-isomerase                              | 0       |
| A0A504XLV8 | Protein kinase domain family protein                     | 0       |
| E9BHI2     | Protein phosphatase, putative                            | 0       |
| A0A3P3Z097 | Protein_transport_protein_SEC31                          | 0       |
| A0A3P3YZJ7 | Pteridine_transporter_(Truncated)                        | 0       |
| A0A504XNP1 | P-type H(+)-exporting transporter                        | 0       |
| A4I7Z0     | Pumilio/PUF_RNA_binding_protein_7_-_putative             | 0       |
| A4I011     | Putative 40S ribosomal protein L14                       | 0       |
| Q4Q1Y3     | Putative 40S ribosomal protein S18                       | 0       |
| E9AJS6     | Putative 60S acidic ribosomal protein P2                 | 0       |
| E9B1E6     | Putative 60S acidic ribosomal protein P2                 | 0       |
| A4H9H2     | Putative 60S ribosomal protein L10a                      | 0       |
| E9ARK0     | Putative 60S ribosomal protein L10a                      | 0       |
| A4HST1     | Putative 60S ribosomal protein L19                       | 0       |
| E9AKR8     | Putative 60S ribosomal protein L19                       | 0       |
| E9AV89     | Putative 60S ribosomal protein L9                        | 0       |
| A4HGV3     | Putative acyl-CoA dehydrogenase                          | 0       |
| Q4QC71     | Putative adenylate kinase                                | 0       |
| Q4QDK5     | Putative aminopeptidase                                  | 0       |

**Table S1 (cont.):** The protein list of high confidence data.

| Accession  | Protein name                                                                               | q-value |
|------------|--------------------------------------------------------------------------------------------|---------|
| E9ALI8     | Putative aspartyl aminopeptidase                                                           | 0       |
| E9AT88     | Putative ATP synthase                                                                      | 0       |
| E8NHQ7     | Putative ATPase alpha subunit                                                              | 0       |
| ABCA10     | Putative ATP-binding cassette protein subfamily A,member 10                                | 0       |
| E9APT0     | Putative calpain-like cysteine peptidase (Putative cysteine peptidase, clan ca, family c2) | 0       |
| A4H7N9     | Putative calpain-like cysteine peptidase                                                   | 0       |
| A4HYX1     | Putative calpain-like cysteine peptidase                                                   | 0       |
| E9AD27     | Putative calpain-like cysteine peptidase                                                   | 0       |
| E9AUR8     | Putative calpain-like cysteine peptidase                                                   | 0       |
| E9AP43     | Putative carboxypeptidase (Metallo-peptidase, clan ma(E), family 32)                       | 0       |
| Q4Q922     | Putative cytochrome c oxidase subunit V                                                    | 0       |
| Q4Q1J6     | Putative developmentally regulated GTP-binding protein 1                                   | 0       |
| A4H7F5     | Putative dynein heavy chain                                                                | 0       |
| E9API9     | Putative dynein heavy chain                                                                | 0       |
| Q5UBY5     | Putative elongation factor 1 beta                                                          | 0       |
| A0A1E1J6Y7 | Putative elongation factor 2                                                               | 0       |
| Q4QDW8     | Putative elongation factor Tu                                                              | 0       |
| Q4QHA6     | Putative eukaryotic translation initiation factor 4 gamma                                  | 0       |
| E9AX71     | Putative fatty-acid desaturase                                                             | 0       |
| Q4QJ42     | Putative glutamine synthetase                                                              | 0       |
| Q4Q843     | Putative glycoprotein 96-92                                                                | 0       |
| E9B125     | Putative heat shock 70-related protein 1, mitochondrial                                    | 0       |
| A4H7X9     | Putative heat shock protein HslVU, ATPase subunit HslU                                     | 0       |
| E9AEE2     | Putative inosine-adenosine-guanosine-nucleoside hydrolase                                  | 0       |
| A4H8S4     | Putative kinesin                                                                           | 0       |
| A4HX43     | Putative kinesin                                                                           | 0       |
| Q4QEL9     | Putative kinesin                                                                           | 0       |
| E9AM02     | Putative lipophosphoglycan biosynthetic protein                                            | 0       |
| A4HMG0     | Putative mitochondrial processing peptidase, beta subunit                                  | 0       |
| E9B1G7     | Putative nucleolar protein                                                                 | 0       |
| E9AQD3     | Putative nucleolar RNA binding protein                                                     | 0       |
| E9B0M6     | Putative p22 protein                                                                       | 0       |
| Q4QHP3     | Putative paraflagellar rod component                                                       | 0       |

**Table S1 (cont.):** The protein list of high confidence data.

| Accession  | Protein name                                                  | q-value |
|------------|---------------------------------------------------------------|---------|
| E9B705     | Putative peptidyl-prolyl cis-trans isomerase (Cyclophilin-40) | 0       |
| A4HPM0     | Putative polyubiquitin                                        | 0       |
| Q4QJ82     | Putative prefoldin subunit                                    | 0       |
| E9ACB2     | Putative proteasome regulatory non-ATPase subunit 6           | 0       |
| Q4QIG6     | Putative Qc-SNARE protein                                     | 0       |
| Q4QJK0     | Putative ras-like small GTPases                               | 0       |
| E9AEX6     | Putative reiske iron-sulfur protein                           | 0       |
| Q4QFF2     | Putative ribonucleoprotein p18, mitochondrial                 | 0       |
| A4I2X5     | Putative ribonucleoside-diphosphate reductase small chain     | 0       |
| E9B578     | Putative ribosomal protein L3                                 | 0       |
| E9AZP7     | Putative RNA binding protein rbp16                            | 0       |
| A4HG34     | Putative serine peptidase                                     | 0       |
| A4I7A1     | Putative serine/threonine-protein kinase                      | 0       |
| E9B602     | Putative short chain dehydrogenase                            | 0       |
| E9AHE8     | Putative small GTP-binding protein Rab1                       | 0       |
| A0A504XFE0 | Putative snoRNA binding domain family protein                 | 0       |
| A4HV28     | Putative S-phase kinase-associated protein                    | 0       |
| A4HMX3     | Putative ubiquitin-activating enzyme e1                       | 0       |
| A0A504XVC4 | Pyridoxal phosphate homeostasis protein                       | 0       |
| E9BDW7     | Pyruvate dehydrogenase E1 component alpha subunit, putative   | 0       |
| A4HEH1     | Pyruvate dehydrogenase E1 component subunit beta              | 0       |
| A0A3P3ZGC0 | Pyruvate kinase                                               | 0       |
| A0A6L0Y0Y0 | Pyruvate kinase                                               | 0       |
| A0A3Q8I917 | Pyruvate, phosphate dikinase                                  | 0       |
| A0A1E1IR88 | Pyruvate, phosphate dikinase                                  | 0       |
| Q4QGX9     | Pyruvate, phosphate dikinase                                  | 0       |
| E9ANP4     | Pyruvate, phosphate dikinase                                  | 0       |
| A0A640KVG1 | Rab-GAP TBC domain-containing protein                         | 0       |
| A0A504Y5I1 | Radial spokehead-like family protein                          | 0       |
| A0A504X172 | RanBP2-type domain-containing protein                         | 0       |
| A0A504XGW3 | Ras family protein                                            | 0       |
| RPA1       | Replication protein A subunit                                 | 0       |
| PAPLE22    | Reticulon-like protein                                        | 0       |
| A0A1E1J0Y4 | Ribosomal protein L1a, putative                               | 0       |



**Table S1 (cont.):** The protein list of high confidence data.

| Accession  | Protein name                                                                                                                                              | q-value |
|------------|-----------------------------------------------------------------------------------------------------------------------------------------------------------|---------|
| A0A640KLM9 | Ribosomal protein L1a, putative                                                                                                                           | 0       |
| A0A1E1IUI9 | Ribosomal protein L3, putative                                                                                                                            | 0       |
| A0A504Y2G2 | Ribosomal protein S10                                                                                                                                     | 0       |
| A0A504XGS2 | Ribosomal protein S3                                                                                                                                      | 0       |
| A0A640KYQ2 | Rieske iron-sulfur protein, putative                                                                                                                      | 0       |
| A0A3Q8IA61 | RNA binding protein, putative                                                                                                                             | 0       |
| A0A1E1IWF3 | RNA helicase, putative                                                                                                                                    | 0       |
| A0A3Q8IF50 | RNA recognition motif family protein                                                                                                                      | 0       |
| A0A504XSH7 | RNA recognition motif family protein                                                                                                                      | 0       |
| A0A504X9G8 | RNA recognition motif family protein                                                                                                                      | 0       |
| A0A6J8F647 | RNA_binding_protein-like_protein/GeneDB:LmjF.07.1 000                                                                                                     | 0       |
| A0A3P3Z845 | RNA_recognition_motif_(a.k.a._RRM)                                                                                                                        | 0       |
| E9AG41     | RNA_recognition_motif_(A.k.a._RRM_-_RBD_-_or_RNP_domain)_-_putative                                                                                       | 0       |
| A0A6J8FBM0 | RNA_recognition_motif_(A.k.a._RRM_RBD_or_RNP_domain)/RNA_recognition_motif_(A.k.a._RRM_RBD_or_RNP_domain)_putative/Pfam:PF00076/Pfam:PF14259/Pfam:PF13893 | 0       |
| A4I5Z0     | RNA-binding_protein_42_(RNA-binding_motif_protein_42)_-_putative                                                                                          | 0       |
| A0A504WZF6 | RRM domain-containing protein                                                                                                                             | 0       |
| A0A088SGN9 | RRM_8 domain-containing protein                                                                                                                           | 0       |
| A0A3Q8IEM3 | RuvB-like helicase                                                                                                                                        | 0       |
| Q4Q2T4     | RuvB-like helicase                                                                                                                                        | 0       |
| A0A504X261 | S-adenosylmethionine synthase                                                                                                                             | 0       |
| A0A1E1J1G3 | Serine/threonine-protein kinase, putative,protein kinase, putative                                                                                        | 0       |
| Q4QJJ3     | Serine/threonine-protein phosphatase                                                                                                                      | 0       |
| A0A3P3ZCB0 | Serine/threonine-protein_kinase                                                                                                                           | 0       |
| A0A3S5H6H8 | Seryl-tRNA synthetase                                                                                                                                     | 0       |
| SGT        | Small glutamine-rich tetratricopeptide repeat protein                                                                                                     | 0       |
| A0A6J8F3S0 | Splicing_factor_ptsr1-like_protein/GeneDB:LmjF.07.0870                                                                                                    | 0       |
| A0A3S7WYJ9 | STOP axonemal protein, putative                                                                                                                           | 0       |
| E9B9K2     | Stress-induced protein sti1                                                                                                                               | 0       |
| A0A640KEQ1 | Stress-induced protein sti1                                                                                                                               | 0       |
| A0A3Q8IJP8 | Stress-inducible protein STI1-like                                                                                                                        | 0       |
| Q4QAG8     | Succinate dehydrogenase [ubiquinone] flavoprotein subunit, mitochondrial                                                                                  | 0       |
| E9BU19     | Succinate--CoA ligase [ADP-forming] subunit beta, mitochondrial                                                                                           | 0       |

**Table S1 (cont.):** The protein list of high confidence data.

| Accession  | Protein name                                                    | q-value |
|------------|-----------------------------------------------------------------|---------|
| E9AT73     | Succinate--CoA ligase [ADP-forming] subunit beta, mitochondrial | 0       |
| A0A640KWV1 | Succinyl-CoA:3-ketoacid-coenzyme A transferase                  | 0       |
| A0A640K939 | Sucrose hydrolase-like protein                                  | 0       |
| A0A3P3Z1T1 | Tb-292_membrane_associated_protein-like_protein                 | 0       |
| A0A3P3Z674 | T-complex protein 1 subunit delta                               | 0       |
| A0A504XGI8 | T-complex protein 1, zeta subunit                               | 0       |
| A0A504XEG0 | Tctex-1 family protein                                          | 0       |
| A4I3H2     | Tctex-1_family_-_putative                                       | 0       |
| A0A504XG10 | ThiF family protein                                             | 0       |
| A0A504XYA2 | Thioredoxin-like family protein                                 | 0       |
| A0A1E1J5N6 | Threonyl-tRNA synthetase                                        | 0       |
| A0A504XU95 | TPR repeat family protein                                       | 0       |
| E9B1C1     | TPR_REGION domain-containing protein                            | 0       |
| A4IAF1     | TPR_repeat_-_putative                                           | 0       |
| E9AQN5     | Transaldolase                                                   | 0       |
| A0A088S247 | Transitional endoplasmic reticulum ATPase, putative             | 0       |
| A0A6L0XTS2 | Transitional_endoplasmic_reticulum_ATPase_-_putative            | 0       |
| A0A504X7J1 | Transketolase                                                   | 0       |
| A0A088SB09 | Transketolase                                                   | 0       |
| A0A640KN03 | Transketolase                                                   | 0       |
| A0A504XII7 | Transketolase, pyrimidine binding domain family protein         | 0       |
| A0A3Q8IVV7 | Translation elongation factor 1-beta, putative                  | 0       |
| E9BGY7     | Translation factor sui1, putative                               | 0       |
| A0A3Q8ICH6 | Translation initiation factor eIF3 subunit, putative            | 0       |
| A0A640KF58 | Transmembrane protein, putative                                 | 0       |
| B5APK4     | Triosephosphate isomerase                                       | 0       |
| tim        | Triosephosphate isomerase                                       | 0       |
| A0A3P3ZAF3 | Trypanothione_synthetase                                        | 0       |
| TXN1       | Tryparedoxin                                                    | 0       |
| Q5UDS8     | Tryparedoxin peroxidase 2                                       | 0       |
| I3W8N6     | Tubulin alpha chain (Fragment)                                  | 0       |
| Q25314     | Tubulin beta chain (Fragment)                                   | 0       |
| A0A3P3YYZ4 | Tubulin beta chain                                              | 0       |
| A4HZJ3     | Tubulin beta chain                                              | 0       |

**Table S1 (cont.):** The protein list of high confidence data.

| Accession  | Protein name                                  | q-value |
|------------|-----------------------------------------------|---------|
| A0A381MTJ3 | Tubulin beta chain                            | 0       |
| Q4QI42     | Tubulin beta chain                            | 0       |
| A4I8B9     | Tubulin-specific chaperone A                  | 0       |
| A0A640KBV9 | Tyrosyl-tRNA synthetase, putative             | 0       |
| A0A504Y1T2 | UBA/TS-N domain family protein                | 0       |
| A4I763     | Ubiquinol-cytochrome-c reductase-like protein | 0       |
| E9AWN2     | Ubiquitin carboxyl-terminal hydrolase         | 0       |
| E9BG91     | Ubiquitin-activating enzyme e1, putative      | 0       |
| A0A640KG80 | Ubiquitin-activating enzyme E1, putative      | 0       |
| Q4QFZ6     | Ubiquitin-conjugating enzyme-like protein     | 0       |
| A0A088RKN0 | Ubiquitin-conjugating enzyme-like protein     | 0       |
| A0A640KUE7 | Ubiquitin-like domain-containing protein      | 0       |
| A0A504WWC4 | Ubiquitin-related modifier 1 homolog          | 0       |
| A4IAL6     | Uncharacterized protein (Fragment)            | 0       |
| A4H7K8     | Uncharacterized protein                       | 0       |
| A4HEG4     | Uncharacterized protein                       | 0       |
| A4HLA5     | Uncharacterized protein                       | 0       |
| E9B7H5     | Uncharacterized protein                       | 0       |
| E9BA34     | Uncharacterized protein                       | 0       |
| E9BAU1     | Uncharacterized protein                       | 0       |
| E9BDB8     | Uncharacterized protein                       | 0       |
| E9BEA7     | Uncharacterized protein                       | 0       |
| E9BFA4     | Uncharacterized protein                       | 0       |
| E9BGD5     | Uncharacterized protein                       | 0       |
| E9BI92     | Uncharacterized protein                       | 0       |
| E9BJ94     | Uncharacterized protein                       | 0       |
| E9BKQ8     | Uncharacterized protein                       | 0       |
| E9BNK3     | Uncharacterized protein                       | 0       |
| E9BNL2     | Uncharacterized protein                       | 0       |
| E9BNL3     | Uncharacterized protein                       | 0       |
| E9BNP6     | Uncharacterized protein                       | 0       |
| E9BQ38     | Uncharacterized protein                       | 0       |
| E9BUW8     | Uncharacterized protein                       | 0       |
| E9BV86     | Uncharacterized protein                       | 0       |

**Table S1 (cont.):** The protein list of high confidence data.

| Accession  | Protein name            | q-value |
|------------|-------------------------|---------|
| A0A504Y4G7 | Uncharacterized protein | 0       |
| A0A504XU23 | Uncharacterized protein | 0       |
| A0A504XL80 | Uncharacterized protein | 0       |
| A0A504XJI4 | Uncharacterized protein | 0       |
| A0A504Y0I8 | Uncharacterized protein | 0       |
| A0A504XTF0 | Uncharacterized protein | 0       |
| A0A504X206 | Uncharacterized protein | 0       |
| A0A504X0A7 | Uncharacterized protein | 0       |
| A0A504X399 | Uncharacterized protein | 0       |
| A0A504XYA8 | Uncharacterized protein | 0       |
| A0A504XWS4 | Uncharacterized protein | 0       |
| A0A504XJG9 | Uncharacterized protein | 0       |
| A0A504XME5 | Uncharacterized protein | 0       |
| A0A504X8W9 | Uncharacterized protein | 0       |
| A0A504Y1F2 | Uncharacterized protein | 0       |
| A0A504XYE2 | Uncharacterized protein | 0       |
| A0A504Y7Y0 | Uncharacterized protein | 0       |
| A0A504XB46 | Uncharacterized protein | 0       |
| A0A3Q8I8X0 | Uncharacterized protein | 0       |
| A0A3Q8ILK3 | Uncharacterized protein | 0       |
| A0A3S7WXH9 | Uncharacterized protein | 0       |
| A0A3S7WZ94 | Uncharacterized protein | 0       |
| A0A3S7X7L7 | Uncharacterized protein | 0       |
| A0A1E1J9A6 | Uncharacterized protein | 0       |
| A0A1E1IR23 | Uncharacterized protein | 0       |
| A0A1E1ITH9 | Uncharacterized protein | 0       |
| A0A1E1ITV1 | Uncharacterized protein | 0       |
| A0A1E1J2B8 | Uncharacterized protein | 0       |
| A4HRG9     | Uncharacterized protein | 0       |
| Q4QH88     | Uncharacterized protein | 0       |
| Q4QGD8     | Uncharacterized protein | 0       |
| Q4QG66     | Uncharacterized protein | 0       |
| Q4QDS8     | Uncharacterized protein | 0       |
| Q4QBS4     | Uncharacterized protein | 0       |

**Table S1 (cont.):** The protein list of high confidence data.

| Accession  | Protein name            | q-value |
|------------|-------------------------|---------|
| Q4QBG8     | Uncharacterized protein | 0       |
| Q4Q976     | Uncharacterized protein | 0       |
| E9AD64     | Uncharacterized protein | 0       |
| E9ADV2     | Uncharacterized protein | 0       |
| Q4Q6X5     | Uncharacterized protein | 0       |
| Q4Q6U6     | Uncharacterized protein | 0       |
| Q4Q6S0     | Uncharacterized protein | 0       |
| Q4Q3I9     | Uncharacterized protein | 0       |
| E9AFR7     | Uncharacterized protein | 0       |
| E9AFW8     | Uncharacterized protein | 0       |
| Q4Q205     | Uncharacterized protein | 0       |
| Q4Q156     | Uncharacterized protein | 0       |
| E9AJG4     | Uncharacterized protein | 0       |
| E9ARU9     | Uncharacterized protein | 0       |
| E9AUG4     | Uncharacterized protein | 0       |
| E9AV78     | Uncharacterized protein | 0       |
| E9AYY9     | Uncharacterized protein | 0       |
| E9B0L2     | Uncharacterized protein | 0       |
| E9B1E2     | Uncharacterized protein | 0       |
| E9B522     | Uncharacterized protein | 0       |
| A0A088RJ39 | Uncharacterized protein | 0       |
| A0A088RP57 | Uncharacterized protein | 0       |
| A0A088RTL3 | Uncharacterized protein | 0       |
| A0A088RWE1 | Uncharacterized protein | 0       |
| A0A088RZ05 | Uncharacterized protein | 0       |
| A0A088S269 | Uncharacterized protein | 0       |
| A0A088S2W4 | Uncharacterized protein | 0       |
| A0A640KEL2 | Uncharacterized protein | 0       |
| A0A640KE76 | Uncharacterized protein | 0       |
| A0A640KFD7 | Uncharacterized protein | 0       |
| A0A640KIU0 | Uncharacterized protein | 0       |
| A0A640KL78 | Uncharacterized protein | 0       |
| A0A640KN04 | Uncharacterized protein | 0       |
| A0A640KNU0 | Uncharacterized protein | 0       |

**Table S1 (cont.):** The protein list of high confidence data.

| Accession  | Protein name                                                                      | q-value |
|------------|-----------------------------------------------------------------------------------|---------|
| A0A640KVV2 | Uncharacterized protein                                                           | 0       |
| Q4Q6V9     | UV excision repair protein RAD23                                                  | 0       |
| A0A088RX52 | V-type ATPase, C subunit, putative                                                | 0       |
| E9ARJ3     | V-type proton ATPase subunit C                                                    | 0       |
| A0A504WVM9 | WD domain, G-beta repeat family protein                                           | 0       |
| Q4Q5T1     | WD_REPEATS_REGION domain-containing protein                                       | 0       |
| E8NHK1     | WGS CADB00000000 data, contig 48 (Fragment)                                       | 0       |
| AAH        | Adenine aminohydrolase                                                            | 0.002   |
| Q4QDJ7     | GN3L_Grn1 domain-containing protein                                               | 0.002   |
| A0A3S5H6T1 | Inositol-3-phosphate synthase                                                     | 0.002   |
| A0A640K9Z4 | Mitochondrial DNA polymerase beta-PAK, putative                                   | 0.002   |
| Q6Y9Q8     | Phosphogluconate dehydrogenase (NADP(+)-dependent, decarboxylating)<br>(Fragment) | 0.002   |
| E9ASE9     | Proteasome subunit beta                                                           | 0.002   |
| A4HMT8     | QA-SNARE protein putative                                                         | 0.002   |
| A0A088RTI0 | RRM domain-containing protein                                                     | 0.002   |
| Q4QH99     | TPH domain-containing protein                                                     | 0.002   |
| A0A3Q8IK28 | Uncharacterized protein                                                           | 0.002   |
| A0A3Q8IHX6 | Uncharacterized protein                                                           | 0.002   |
| A0A3Q8IA11 | Uncharacterized protein                                                           | 0.002   |
| Q9NJ10     | 3FI8BORFP (Fragment)                                                              | 0.004   |
| A0A3Q8IFI6 | 60S ribosomal protein L13, putative                                               | 0.004   |
| A0A3S7WWN3 | Adenylate kinase, putative                                                        | 0.004   |
| A0A504X3J8 | Alkyldihydroxyacetonephosphate_synthase/GeneDB:Lm jF.30.0120                      | 0.004   |
| Q25281     | Alpha-tubulin DNA, partial cds (Fragment)                                         | 0.004   |
| Q4QJH7     | ANK_REP_REGION domain-containing protein                                          | 0.004   |
| A4I4I8     | Carnitine/choline_acetyltransferase_-_putative                                    | 0.004   |
| A0A088S0F0 | Cell cycle sequence binding phosphoprotein (RBP33), putative                      | 0.004   |
| A4HB65     | Contig, possible fusion of chromosomes 20 and 34                                  | 0.004   |
| A0A640KG11 | Cyclophilin                                                                       | 0.004   |
| A0A3Q8ING8 | DNA polymerase delta subunit 2, putative                                          | 0.004   |
| A0A504XY66 | Elongation of fatty acids protein                                                 | 0.004   |
| A0A504XM61 | Emp24/gp25L/p24 family/GOLD protein                                               | 0.004   |
| E9B178     | Eukaryotic translation initiation factor 3 subunit 7-like protein                 | 0.004   |

**Table S1 (cont.):** The protein list of high confidence data.

| Accession  | Protein name                                                                 | q-value |
|------------|------------------------------------------------------------------------------|---------|
| A4HV24     | Eukaryotic_release_factor_3_-_putative                                       | 0.004   |
| A0A3Q8IUP6 | Flagellar attachment zone protein, putative                                  | 0.004   |
| E9AWM1     | Fumarate hydratase                                                           | 0.004   |
| A0A3P3ZF14 | Glucosamine-6-phosphate isomerase                                            | 0.004   |
| A0A6J8F833 | Glycogen_synthase_kinase_3_putative/GeneDB:LmjF.1 8.0270                     | 0.004   |
| A0A3P3Z113 | GPN-loop GTPase                                                              | 0.004   |
| A0A088RK67 | Guanine nucleotide-binding protein subunit beta-like protein                 | 0.004   |
| A0A088RWE9 | Importin subunit alpha                                                       | 0.004   |
| E9AVW9     | Intraflagellar transport protein-like protein                                | 0.004   |
| A0A6L0WVD9 | NADH:flavin_oxidoreductase/NADH_oxidase_-_putative                           | 0.004   |
| A0A504XQ49 | NMDA receptor-regulated protein 1 family protein                             | 0.004   |
| A0A3S7X218 | Plastid-encoded RNA polymerase subunit alpha                                 | 0.004   |
| A0A3S7WPD8 | Proteasome subunit beta                                                      | 0.004   |
| A0A504XNZ6 | Protein transport protein SEC23                                              | 0.004   |
| A0A3Q8IBR6 | Protein YIPF                                                                 | 0.004   |
| A0A3P3Z0X4 | Protein_kinase_A_regulatory_subunit                                          | 0.004   |
| A0A3S5H745 | Pumilio protein 2, putative                                                  | 0.004   |
| E9AQ49     | Putative ecotin                                                              | 0.004   |
| E9AD91     | Putative intraflagellar transport protein IFT88                              | 0.004   |
| A0A1E1INL4 | Putative nascent polypeptide associated complex subunit-like protein, copy 1 | 0.004   |
| Q4Q3Z4     | Putative phosphoribosyl transferase                                          | 0.004   |
| E9B2J9     | Putative RNA binding protein                                                 | 0.004   |
| A0A1E1INT0 | Putative unspecified product                                                 | 0.004   |
| FeSODA     | Superoxide dismutase                                                         | 0.004   |
| A4I289     | Trifunctional enzyme alpha subunit, mitochondrial-like protein               | 0.004   |
| A0A3S5H810 | Uncharacterized protein                                                      | 0.004   |
| A4I9N8     | Uncharacterized protein                                                      | 0.004   |
| E9AJY0     | Uncharacterized protein                                                      | 0.004   |
| E9AM96     | Uncharacterized protein                                                      | 0.004   |
| A0A640KR93 | Uncharacterized protein                                                      | 0.004   |
| A0A640KV22 | Uncharacterized protein                                                      | 0.004   |
| E9AXJ1     | Aldehyde dehydrogenase, mitochondrial                                        | 0.005   |
| ALDH2      | Aldehyde dehydrogenase, mitochondrial                                        | 0.005   |
| A0A088RW10 | Aminopeptidase                                                               | 0.005   |

**Table S1 (cont.):** The protein list of high confidence data.

| Accession  | Protein name                                                           | q-value |
|------------|------------------------------------------------------------------------|---------|
| A0A1E1J787 | Carboxypeptidase, putative,metallo-peptidase,Clan MA(E), Family M32    | 0.005   |
| A0A088RVG4 | Coatomer subunit gamma                                                 | 0.005   |
| A0A3S7X5G0 | COP9 signalosome, subunit CSN8 family protein                          | 0.005   |
| A0A504XFK1 | Cytidyltransferase-like domain protein                                 | 0.005   |
| A0A3S7WPS2 | Cytokine-induced anti-apoptosis inhibitor 1, Fe-S biogenesis, putative | 0.005   |
| A0A3Q8IEP9 | Divalent cation transporter, putative                                  | 0.005   |
| E9AN61     | Glycerol-3-phosphate dehydrogenase [NAD(+)]                            | 0.005   |
| A0A088SLT7 | GTPase activating protein, putative                                    | 0.005   |
| A0A504XJ52 | Guanine nucleotide-binding protein subunit beta-like protein           | 0.005   |
| A0A3P3YZC2 | Hypothetical_protein                                                   | 0.005   |
| A0A6J8F9F3 | Hypothetical_protein                                                   | 0.005   |
| A4HXD7     | Hypothetical_protein_-_conserved                                       | 0.005   |
| E9AHB4     | Hypothetical_protein_-_conserved                                       | 0.005   |
| A4I4F8     | Hypothetical_protein_-_conserved                                       | 0.005   |
| A0A504XNG2 | Hypothetical_protein_conserved                                         | 0.005   |
| A0A504XE44 | Hypothetical_protein_conserved                                         | 0.005   |
| A0A504XJ57 | Hypothetical_protein_conserved                                         | 0.005   |
| A0A3S7X4Y5 | Hypothetical_protein_conserved                                         | 0.005   |
| A0A504WXA4 | Insulinase (Peptidase M16) family protein                              | 0.005   |
| A0A1E1IZB1 | Intraflagellar transport protein IFT88, putative                       | 0.005   |
| A0A5B8YYQ6 | Isocitrate dehydrogenase (NADP(+)) (Fragment)                          | 0.005   |
| A0A5B8YZ17 | Isocitrate dehydrogenase (NADP(+)) (Fragment)                          | 0.005   |
| A0A3S7X0C7 | Kinetoplast-associated protein-like protein                            | 0.005   |
| A0A640KP67 | Mannose-6-phosphate isomerase                                          | 0.005   |
| E9AKE1     | N(1),N(8)-bis(glutathionyl)spermidine reductase                        | 0.005   |
| A4I949     | Nucleolar GTP-binding protein 1                                        | 0.005   |
| A0A1E1J645 | Phosphoinositide-binding protein, putative                             | 0.005   |
| A0A3P3Z1N9 | Possible_lysinе_decarboxylase                                          | 0.005   |
| A1Y2D3     | Prostaglandin f2-alpha synthase (Fragment)                             | 0.005   |
| A0A640KPI3 | Protein phosphatase 2A catalytic subunit, putative                     | 0.005   |
| A0A640KVP0 | Puf1, putative                                                         | 0.005   |
| E9B669     | Putative 60S Ribosomal protein L36                                     | 0.005   |
| A0A1E1IYC2 | Putative adenine phosphoribosyltransferase                             | 0.005   |
| E9B3K9     | Putative autophagocytosis protein                                      | 0.005   |



**Table S1 (cont.):** The protein list of high confidence data.

| Accession  | Protein name                                                                                                         | q-value |
|------------|----------------------------------------------------------------------------------------------------------------------|---------|
| Q4Q7K6     | Putative p22 protein                                                                                                 | 0.005   |
| A0A1E1J315 | Putative prostaglandin f2-alpha synthase/D-arabinose dehydrogenase                                                   | 0.005   |
| Q4QCN3     | Putative SNAP protein                                                                                                | 0.005   |
| E9ALA2     | Putative ubiquitin-conjugating enzyme e2 (Putative ubiquitin-protein ligase)<br>(Putative ubiquitin carrier protein) | 0.005   |
| A0A3P3ZHC3 | Ribosomal_protein_L32                                                                                                | 0.005   |
| A0A640KI19 | RRM domain-containing protein                                                                                        | 0.005   |
| A0A3P3YYV3 | Small_ubiquitin_protein                                                                                              | 0.005   |
| Q25308     | Squalene synthase                                                                                                    | 0.005   |
| A0A504XQJ1 | T-complex protein 1 subunit gamma                                                                                    | 0.005   |
| A0A3S7XAC9 | TPR repeat family protein                                                                                            | 0.005   |
| TXN2       | TXN2 protein                                                                                                         | 0.005   |
| A4HJE4     | Uncharacterized protein (Fragment)                                                                                   | 0.005   |
| E9B9E8     | Uncharacterized protein                                                                                              | 0.005   |
| E9BFA8     | Uncharacterized protein                                                                                              | 0.005   |
| A0A504XMU4 | Uncharacterized protein                                                                                              | 0.005   |
| A0A3S7X8X6 | Uncharacterized protein                                                                                              | 0.005   |
| Q4QFQ3     | Uncharacterized protein                                                                                              | 0.005   |
| Q4Q154     | Uncharacterized protein                                                                                              | 0.005   |
| E9AKK0     | Uncharacterized protein                                                                                              | 0.005   |
| E9AU72     | Uncharacterized protein                                                                                              | 0.005   |
| A0A640K9C1 | Uncharacterized protein                                                                                              | 0.005   |
| A0A640KQN3 | Uncharacterized protein                                                                                              | 0.005   |
| E9AUL9     | Vesicle-fusing ATPase                                                                                                | 0.005   |
| A0A088RTY6 | Vesicular-fusion ATPase-like protein, putative                                                                       | 0.005   |
| E9BD99     | VID27 domain-containing protein                                                                                      | 0.005   |
| A0A504XYH5 | WD_REPEATS_REGION domain-containing protein                                                                          | 0.005   |
| A0A640KU28 | 5-methyltetrahydropteroyltriglutamate--homocysteine S-methyltransferase                                              | 0.006   |
| A0A088S233 | Clathrin heavy chain                                                                                                 | 0.006   |
| A0A504XE41 | Coatomer subunit epsilon                                                                                             | 0.006   |
| E9BDQ8     | DNA-directed RNA polymerases II, putative                                                                            | 0.006   |
| A0A3Q8IAL4 | DNAj-like protein                                                                                                    | 0.006   |
| A0A1E1IXH9 | Dynein light chain, putative                                                                                         | 0.006   |
| A0A504XEC6 | EF-hand domain pair family protein                                                                                   | 0.006   |

**Table S1 (cont.):** The protein list of high confidence data.

| Accession  | Protein name                                                            | q-value |
|------------|-------------------------------------------------------------------------|---------|
| A0A504XEU7 | Frag1/DRAM/Sfk1 family protein                                          | 0.006   |
| A0A504XJ16 | Hypothetical_protein_conserved                                          | 0.006   |
| A0A6J8FCN9 | Hypothetical_protein_conserved                                          | 0.006   |
| A0A504XDT4 | Intraflagellar transport complex B protein 46 C terminal family protein | 0.006   |
| A4I5D9     | IQ_calmodulin-binding_motif_containing_protein_-_putative               | 0.006   |
| A0A504Y4I6 | Isochorismatase family protein                                          | 0.006   |
| A0A504XUX5 | Leucine Rich repeat family protein                                      | 0.006   |
| E9BAF3     | Nucleoside phosphorylase-like protein                                   | 0.006   |
| A4HZT9     | Proteasome_regulatory_ATPase_subunit_5_-_putative                       | 0.006   |
| E9ANA1     | Putative small GTP-binding protein Rab11                                | 0.006   |
| A0A6J8FPG9 | Roadblock/LC7_domain_containing_protein_putative/ Pfam:PF03259          | 0.006   |
| A0A088S004 | Transcription elongation factor-like protein                            | 0.006   |
| A0A504WXU1 | Uncharacterized protein                                                 | 0.006   |
| A0A640KSS9 | Uncharacterized protein                                                 | 0.006   |
| E9BUP8     | Vacuolar protein sorting-associated protein 28 homolog                  | 0.006   |
| A0A504X5L7 | Ankyrin repeats (3 copies) family protein                               | 0.007   |
| A0A088RZ02 | Meiosis-specific nuclear structural protein 1                           | 0.007   |
| A0A3S7WVD1 | SNARE protein, putative                                                 | 0.007   |
| A0A504X2E2 | Transcriptional repressor TCF25 family protein                          | 0.007   |
| A0A504WWB2 | Ubiquitin carboxyl-terminal hydrolase family protein                    | 0.007   |
| A0A640KIM8 | Uncharacterized protein                                                 | 0.007   |
| A4I3X4     | Vacuolar proton pump subunit B                                          | 0.007   |
| E9BPG6     | WD_REPEATS_REGION domain-containing protein                             | 0.007   |
| A0A504Y8P2 | 2-oxoisovalerate dehydrogenase subunit alpha                            | 0.008   |
| A0A504YBK0 | Acid_Phosphatase_putative/Pfam:PF12689                                  | 0.008   |
| E9AZM9     | ANK_REP_REGION domain-containing protein                                | 0.008   |
| E9AJY3     | Calcium-transporting ATPase                                             | 0.008   |
| A0A6J8FT87 | CG1104_protein-like_protein/GeneDB:LmjF.36.6800                         | 0.008   |
| A4HYX7     | Coatomer subunit beta                                                   | 0.008   |
| A0A504XS31 | Elongation factor Tu GTP binding domain family protein                  | 0.008   |
| A0A3S7X869 | Exosome subunit rrp6p-like, putative                                    | 0.008   |
| A0A504XJK8 | FAD linked oxidase, C-terminal domain family protein                    | 0.008   |
| A0A504XM90 | Hypothetical_protein_conserved                                          | 0.008   |
| A0A6J8F7H5 | Hypothetical_protein_conserved                                          | 0.008   |

**Table S1 (cont.):** The protein list of high confidence data.

| Accession  | Protein name                                                 | q-value |
|------------|--------------------------------------------------------------|---------|
| A0A640KGF0 | LsmAD domain-containing protein                              | 0.008   |
| E9AF09     | Putative 60S ribosomal protein L5                            | 0.008   |
| E9B1D4     | Putative ATP synthase, epsilon chain                         | 0.008   |
| A4HUM8     | Putative rab1 small GTP-binding protein                      | 0.008   |
| A0A3S7WZF9 | Ribosome production factor 2 homolog                         | 0.008   |
| E9AY57     | RRM domain-containing protein                                | 0.008   |
| A0A504XZQ9 | Transmembrane amino acid transporter family protein          | 0.008   |
| A0A3S5H570 | Uncharacterized protein                                      | 0.008   |
| A0A640KH80 | Uncharacterized protein                                      | 0.008   |
| A0A640KIX9 | Uncharacterized protein                                      | 0.008   |
| A0A1E1J828 | Vacuolar protein sorting-associated protein 28 homolog       | 0.008   |
| E9AK29     | 60S ribosomal protein L11 (L5, L16)                          | 0.009   |
| E9AGI9     | Arginine N-methyltransferase-like protein                    | 0.009   |
| E9B0H1     | Aspartyl-tRNA synthetase                                     | 0.009   |
| A0A640KPZ2 | CSN8_PSD8_EIF3K domain-containing protein                    | 0.009   |
| A4I2U7     | DNA-directed RNA polymerase II-like protein                  | 0.009   |
| A4I9P6     | DNA-directed_RNA_polymerase_III_subunit_-_putative           | 0.009   |
| A0A640KV90 | EF-hand domain-containing protein                            | 0.009   |
| A0A088RNK6 | Eukaryotic translation initiation factor 5, putative         | 0.009   |
| A0A640KB19 | Glycosyltransferase family-like protein                      | 0.009   |
| A0A088RLU0 | Guanine nucleotide-binding protein subunit beta-like protein | 0.009   |
| A0A640KJ19 | HpcH_HpaI domain-containing protein                          | 0.009   |
| A0A3P3Z768 | Hypothetical_protein                                         | 0.009   |
| A0A3Q8IK43 | Hypothetical_protein                                         | 0.009   |
| A0A504WT12 | Hypothetical_protein_conserved                               | 0.009   |
| A0A6J8FEL4 | Hypothetical_protein_conserved                               | 0.009   |
| A0A6J8FM46 | Hypothetical_protein_conserved                               | 0.009   |
| A0A504X7J7 | IQ calmodulin-binding motif family protein                   | 0.009   |
| A4I9B3     | MRB1-associated_protein                                      | 0.009   |
| A0A504XSF9 | Phosphoribosyl transferase domain family protein             | 0.009   |
| E9B9B7     | Proteasome regulatory non-ATP-ase subunit, putative          | 0.009   |
| A0A3P3ZE43 | Protein_transport_protein_SEC13                              | 0.009   |
| Q4Q9Y0     | Putative cytochrome c oxidase VII                            | 0.009   |
| P84066     | Putative D-tyrosyl-tRNA(Tyr) deacylase 2                     | 0.009   |

**Table S1 (cont.):** The protein list of high confidence data.

| Accession  | Protein name                                                 | q-value |
|------------|--------------------------------------------------------------|---------|
| E9AEM7     | Putative proteophosphoglycan ppg3                            | 0.009   |
| E9ARF9     | Putative RNA-binding protein                                 | 0.009   |
| E9B9F7     | Ribose-phosphate pyrophosphokinase, putative                 | 0.009   |
| A4HXS8     | Tubulin_cofactor_C_domain-containing_protein_RP2_-_putative  | 0.009   |
| E9BEZ1     | Uncharacterized protein                                      | 0.009   |
| E9BP55     | Uncharacterized protein                                      | 0.009   |
| E9AS94     | Uncharacterized protein                                      | 0.009   |
| E9B2V2     | Uncharacterized protein                                      | 0.009   |
| A0A640KEY4 | Uncharacterized protein                                      | 0.009   |
| A0A640KQJ3 | Uncharacterized protein                                      | 0.009   |
| A0A1E1J1A3 | Vesicle-fusing ATPase                                        | 0.009   |
| A0A1E1J477 | AMPK1_CBM domain-containing protein                          | 0.01    |
| A4I7L0     | Prostaglandin_f_synthase_-_putative                          | 0.01    |
| A0A088RN80 | Uncharacterized protein                                      | 0.01    |
| E9AS52     | Guanine nucleotide-binding protein subunit beta-like protein | 0.011   |
| A4HM86     | Proteophosphoglycan ppg4                                     | 0.011   |
| O96636     | Ribosomal protein L17                                        | 0.011   |
| A0A504XDF3 | Uncharacterized protein                                      | 0.011   |
| A0A1E1J7U6 | Uncharacterized protein                                      | 0.011   |
| E9AXA5     | Uncharacterized protein                                      | 0.011   |
| PRO-1      | Probable transport protein                                   | 0.012   |
| A4H4F0     | Uncharacterized protein                                      | 0.012   |
| E9AF64     | WD_REPEATS_REGION domain-containing protein                  | 0.012   |
| A0A504WWF0 | Coatomer subunit delta                                       | 0.014   |
| E9BTN0     | Poly-zinc finger protein 2, putative                         | 0.014   |
| A0A0R6YBV7 | Putative xylulokinase (Fragment)                             | 0.014   |
| E9BJC2     | GMP_PDE_delta domain-containing protein                      | 0.016   |
| A0A3S7WXL7 | Hypothetical_protein_conserved                               | 0.016   |
| A0A6J8FLI6 | Hypothetical_protein_conserved                               | 0.016   |
| A0A6J8FM29 | Hypothetical_protein_conserved                               | 0.016   |
| A0A1E1IVZ9 | Putative cell division protein kinase 2,cdc2-related kinase  | 0.016   |
| A0A1E1INF5 | Putative unspecified product                                 | 0.016   |
| A0A3Q8IG34 | Uncharacterized protein                                      | 0.016   |
| Q4Q9Y7     | Uncharacterized protein                                      | 0.016   |

**Table S1 (cont.):** The protein list of high confidence data.

| Accession  | Protein name                                                 | q-value |
|------------|--------------------------------------------------------------|---------|
| Q4QCU9     | 1,2-dihydroxy-3-keto-5-methylthiopentene dioxygenase         | 0.017   |
| A0A640K8D1 | 26s protease regulatory subunit, putative                    | 0.017   |
| A0A451EJU1 | Amidohydrolase family protein                                | 0.017   |
| A0A504Y9I9 | dUTPase family protein                                       | 0.017   |
| A0A504XT81 | Endonuclease/Exonuclease/phosphatase family protein          | 0.017   |
| A0A3Q8IJA9 | Eukaryotic translation initiation factor 4 gamma, putative   | 0.017   |
| A0A1E1J267 | Formyltetrahydrofolate synthetase                            | 0.017   |
| A4HET7     | Glutathione peroxidase                                       | 0.017   |
| A4I812     | Hypothetical_protein_-_conserved                             | 0.017   |
| A0A504X2N2 | Methyltransferase                                            | 0.017   |
| Q4QH21     | Putative 3-methylcrotonoyl-CoA carboxylase beta subunit      | 0.017   |
| Q95Z92     | Putative cAMP-specific phosphodiesterase                     | 0.017   |
| E9BA61     | Uncharacterized protein                                      | 0.017   |
| A0A504XKN2 | Uncharacterized protein                                      | 0.017   |
| A0A1E1IND5 | Uncharacterized protein                                      | 0.017   |
| A0A1E1J6Q6 | Uncharacterized protein                                      | 0.017   |
| Q4QDX5     | Uncharacterized protein                                      | 0.017   |
| E9AND2     | Uncharacterized protein                                      | 0.017   |
| E9AQ01     | Uncharacterized protein                                      | 0.017   |
| E9B005     | Uncharacterized protein                                      | 0.017   |
| A0A504Y422 | Papain cysteine protease family protein                      | 0.018   |
| A0A088RJ71 | AAA family ATPase, putative                                  | 0.019   |
| A0A640KKB1 | Methylmalonyl-CoA mutase                                     | 0.019   |
| E9AZA5     | Uncharacterized protein                                      | 0.019   |
| A0A640KGU7 | 40S ribosomal protein S15a                                   | 0.02    |
| E9AW96     | Actin interacting protein-like protein                       | 0.02    |
| A0A6L0X2H1 | ATP pyrophosphate-lyase                                      | 0.02    |
| E9AH36     | ATP-dependent_DEAD/H_RNA_helicase_-_putative                 | 0.02    |
| A0A504XYX1 | DEAD/DEAH box helicase family protein                        | 0.02    |
| A0A3S7WXU8 | Dynein heavy chain, putative                                 | 0.02    |
| A4HWW6     | Eukaryotic translation initiation factor 2A                  | 0.02    |
| EIF6       | Eukaryotic translation initiation factor 6                   | 0.02    |
| E9ARV1     | Glutamate--cysteine ligase                                   | 0.02    |
| A4HH81     | Guanine nucleotide-binding protein subunit beta-like protein | 0.02    |

**Table S1 (cont.):** The protein list of high confidence data.

| Accession  | Protein name                                                       | q-value |
|------------|--------------------------------------------------------------------|---------|
| A4I096     | Hypothetical_protein_-_conserved                                   | 0.02    |
| A4I1E1     | Hypothetical_protein_-_conserved                                   | 0.02    |
| A4I5H9     | Kinesin_-_putative                                                 | 0.02    |
| E9B5Y1     | Non-specific serine/threonine protein kinase                       | 0.02    |
| A0A504WYD7 | Paraflagellar rod family protein                                   | 0.02    |
| A4HXP1     | Protein-serine/threonine phosphatase                               | 0.02    |
| E9B304     | Putative ATP-dependent RNA helicase                                | 0.02    |
| A0A504XKP3 | Putative nuclear pore complex protein family protein               | 0.02    |
| A4I6L8     | Putative sodium stibogluconate resistance protein                  | 0.02    |
| E9ADS7     | Putative U3 small nucleolar ribonucleoprotein protein MPP10        | 0.02    |
| E9BN99     | Uncharacterized protein                                            | 0.02    |
| A0A504Y8N8 | Uncharacterized protein                                            | 0.02    |
| A0A3Q8IIV0 | Uncharacterized protein                                            | 0.02    |
| A0A3Q8IFH1 | Uncharacterized protein                                            | 0.02    |
| A0A1E1J6G7 | Uncharacterized protein                                            | 0.02    |
| Q4QIZ2     | Uncharacterized protein                                            | 0.02    |
| E9ADP1     | Uncharacterized protein                                            | 0.02    |
| E9AWR5     | Uncharacterized protein                                            | 0.02    |
| E9AZ92     | Uncharacterized protein                                            | 0.02    |
| E9ASK5     | Uncharacterized protein                                            | 0.02    |
| A0A640K9Z2 | Uncharacterized protein                                            | 0.02    |
| A0A640KDN0 | Uncharacterized protein                                            | 0.02    |
| A0A504XJG5 | VHS domain family protein                                          | 0.02    |
| A4I9G2     | Coatomer subunit beta'                                             | 0.024   |
| A0A381MVV1 | D-isomer specific 2-hydroxyacid dehydrogenase-like protein         | 0.024   |
| A0A504XAH6 | Hypothetical_protein_conserved                                     | 0.024   |
| A4HZ53     | La_RNA_binding_protein_-_putative                                  | 0.024   |
| A0A3Q8I9I8 | OTU-like cysteine protease, putative                               | 0.024   |
| A0A3Q8I1Y1 | Proteasome complex subunit Rpn13 ubiquitin receptor family protein | 0.024   |
| A0A504XGZ0 | Uncharacterized protein                                            | 0.024   |
| E9AEK7     | Uncharacterized protein                                            | 0.024   |
| A0A640KQW0 | Chaperonin alpha subunit, putative                                 | 0.025   |
| A4HG65     | Glycerol-3-phosphate dehydrogenase                                 | 0.025   |
| E9AJT7     | Putative 26S protease regulatory subunit                           | 0.025   |

**Table S1 (cont.):** The protein list of high confidence data.

| Accession  | Protein name                                                   | q-value |
|------------|----------------------------------------------------------------|---------|
| A0A504Y3F6 | Pyr_redox_2 domain-containing protein                          | 0.025   |
| A4IBY0     | Snf7_-putative                                                 | 0.025   |
| E9B7J0     | Uncharacterized protein                                        | 0.025   |
| E9AMQ3     | Uncharacterized protein                                        | 0.025   |
| E9ANW4     | Uncharacterized protein                                        | 0.025   |
| A0A504XU13 | DnaJ domain family protein                                     | 0.027   |
| A0A3S7X408 | Intergrin alpha chain protein, putative                        | 0.027   |
| A0A1E1J1L9 | Rac serine-threonine kinase, putative,protein kinase, putative | 0.027   |
| A4H3K7     | Uncharacterized protein                                        | 0.027   |
| E9ALF6     | Uncharacterized protein                                        | 0.027   |
| E9B3Z9     | Uncharacterized protein                                        | 0.027   |
| A0A640K952 | Uncharacterized protein                                        | 0.027   |
| A0A3Q8IBN2 | ATP-dependent RNA helicase, putative                           | 0.028   |
| A0A1E1IYQ0 | DNA ligase k alpha, putative                                   | 0.028   |
| A0A6J8F4U2 | Exocyst_complex_component_Sec3_putative/Pfam:PF09 763          | 0.028   |
| A4I4K9     | Hypothetical_protein_-_conserved                               | 0.028   |
| A4I607     | Hypothetical_protein_-_conserved                               | 0.028   |
| A0A3P3Z1S5 | Metalloprotease                                                | 0.028   |
| A0A640KQ09 | Microtubule-associated protein, putative                       | 0.028   |
| A0A3S7X9F4 | NLI interacting factor-like phosphatase family protein         | 0.028   |
| E9B1F3     | Peptidyl-prolyl cis-trans isomerase                            | 0.028   |
| A4H3B9     | Phosphoglycan beta 1,3 galactosyltransferase                   | 0.028   |
| E9AVW8     | Putative farnesyl pyrophosphate synthase                       | 0.028   |
| E9AXH4     | Tubulin gamma chain                                            | 0.028   |
| A4H491     | Uncharacterized protein                                        | 0.028   |
| E9B193     | 3-hydroxy-3-methylglutaryl coenzyme A reductase                | 0.029   |
| A0A3S5H5D7 | Adenylate kinase family protein                                | 0.029   |
| A0A640KDY5 | Endoplasmic reticulum oxidoreductin, putative                  | 0.029   |
| A0A3P3ZBN9 | Hypothetical_protein                                           | 0.029   |
| A4HWT9     | Hypothetical_protein_-_conserved                               | 0.029   |
| A4I319     | Hypothetical_protein_-_conserved                               | 0.029   |
| A4ICG1     | Hypothetical_protein_-_conserved                               | 0.029   |
| A0A6J8FS73 | Hypothetical_protein_conserved                                 | 0.029   |
| A4ICN4     | Intraflagellar transport protein 122 homolog                   | 0.029   |

**Table S1 (cont.):** The protein list of high confidence data.

| Accession  | Protein name                                                 | q-value |
|------------|--------------------------------------------------------------|---------|
| A0A3S7WT79 | Mitochondrial pyruvate carrier                               | 0.029   |
| A0A504Y8T0 | Peptidase M3 family protein                                  | 0.029   |
| A0A640KLI2 | SUI1 domain-containing protein                               | 0.029   |
| A0A3Q8IUB2 | Uncharacterized protein                                      | 0.029   |
| A0A640KQE8 | Uncharacterized protein                                      | 0.029   |
| A0A1E1J4R1 | Pumilio protein, putative                                    | 0.03    |
| A0A1E1INY2 | Putative unspecified product                                 | 0.03    |
| A0A504WY56 | Elongation factor Tu GTP binding domain family protein       | 0.031   |
| A0A504XUY4 | Leishmanolysin                                               | 0.031   |
| A0A504Y1G1 | Uncharacterized protein                                      | 0.031   |
| A0A088RZI2 | ABC transporter, putative                                    | 0.032   |
| A0A3S7X7M2 | ATP-binding cassette protein subfamily B, member 2, putative | 0.032   |
| A0A640KP84 | C-1-tetrahydrofolate synthase, cytoplasmic, putative         | 0.032   |
| A0A504Y9W9 | Calcineurin-like phosphoesterase family protein              | 0.032   |
| E9AS44     | CAP-Gly domain-containing protein                            | 0.032   |
| A4IA07     | Dynamamin_family/50S_ribosome-binding_GTPase_-_putative      | 0.032   |
| A0A640KFR4 | Flagellar protofilament ribbon protein-like protein          | 0.032   |
| A0A504WX94 | Major Facilitator Superfamily protein                        | 0.032   |
| A0A504X152 | Protein kinase domain family protein                         | 0.032   |
| A0A3S7WVY1 | Pseudouridine synthase TruD, putative                        | 0.032   |
| A0A220QLW6 | Putative coat protein                                        | 0.032   |
| A4HDG7     | Putative pre-mRNA splicing factor                            | 0.032   |
| A0A1E1J105 | Uncharacterized protein                                      | 0.032   |
| E9B3E0     | Uncharacterized protein                                      | 0.032   |
| A0A640KFS8 | Uncharacterized protein                                      | 0.032   |
| A0A6L0XFE2 | 4-coumarate:coa_ligase-like_protein                          | 0.033   |
| A0A504XYI0 | 6-phosphofructo-2-kinase family protein                      | 0.033   |
| A0A640KSA8 | GTPase protein, putative                                     | 0.033   |
| A0A504XKZ4 | Helicase associated domain (HA2) family protein              | 0.033   |
| A0A3P3Z3B7 | Hypothetical_protein                                         | 0.033   |
| A4I9A8     | Hypothetical_protein_-_conserved                             | 0.033   |
| A4H7I2     | PX domain-containing protein                                 | 0.033   |
| A0A1E1J7B6 | Uncharacterized protein                                      | 0.033   |
| E9B370     | Uncharacterized protein                                      | 0.033   |



**Table S1 (cont.):** The protein list of high confidence data.

| Accession  | Protein name                                        | q-value |
|------------|-----------------------------------------------------|---------|
| A0A088RIN8 | Uncharacterized protein                             | 0.033   |
| A0A640KKM2 | Uncharacterized protein                             | 0.033   |
| A0A504XC32 | Valyl-tRNA synthetase                               | 0.033   |
| A4HZU2     | Guide_RNA_associated_protein_-_GAP2_-_putative      | 0.034   |
| A0A3P3Z2K2 | Hypothetical_protein                                | 0.034   |
| A4HX35     | OTU-like_cysteine_protease_-_putative               | 0.034   |
| A0A640KHI8 | Proteasome regulatory ATPase subunit 1, putative    | 0.034   |
| A0A640KEB3 | Stomatin-like protein                               | 0.034   |
| A0A504Y7Y6 | Uncharacterized protein                             | 0.034   |
| Q4QEU7     | Uncharacterized protein                             | 0.034   |
| A4I4Y2     | 40S ribosomal protein S19-like protein              | 0.036   |
| A4ICN5     | 40S_ribosomal_protein_S10_-_putative                | 0.036   |
| A0A640KR98 | AAA domain-containing protein                       | 0.036   |
| A4I4V7     | Hypothetical_protein_-_conserved                    | 0.036   |
| Q4QBD7     | Putative cytochrome c oxidase subunit 10            | 0.036   |
| A0A640KAC0 | RNA helicase, putative                              | 0.036   |
| A0A3S5H7S6 | Uncharacterized protein                             | 0.036   |
| E9AF83     | Uncharacterized protein                             | 0.036   |
| A4I5E0     | WW_domain_containing_protein_-_putative             | 0.036   |
| A4HM95     | Uncharacterized protein                             | 0.038   |
| Q4Q1T2     | Uncharacterized protein                             | 0.038   |
| A0A3P3Z716 | Galactose_oxidase                                   | 0.039   |
| A0A1E1IS56 | Cyclic nucleotide-binding domain-containing protein | 0.04    |
| A0A3P3Z230 | Phosphodiesterase                                   | 0.04    |
| A0A504X5J2 | Surface_antigen-like_protein/GeneDB:LmjF.09.0580    | 0.04    |
| E9AMD4     | Cyclopropane-fatty-acyl-phospholipid synthase       | 0.041   |
| A0A504X704 | Hypothetical_protein_conserved                      | 0.041   |
| A4I6S7     | Uncharacterized protein                             | 0.041   |
| E9B9N8     | Uncharacterized protein                             | 0.042   |
| A0A088RKY6 | Uncharacterized protein                             | 0.042   |

**Table S2:** Accession number of proteins from the Venn-diagram comparing proteins identified from three leishmania species.

| <i>L. donovani</i> | <i>L. martiniquensis</i> | <i>L. orientalis</i> | <i>L. donovani and L. martiniquensis</i> | <i>L. donovani and L. orientalis</i> | <i>L. martiniquensis and L. orientalis</i> |
|--------------------|--------------------------|----------------------|------------------------------------------|--------------------------------------|--------------------------------------------|
| Q66VD6             | A4HVW1                   | A0A5B8Z0A1           | Q4QHP3                                   | E9B578                               | A0A3P3ZI57                                 |
| A0A3S5H5D7         | A0A640KHX9               | A0A1E1ISJ7           | E9ARJ3                                   | A4HY66                               | A0A3P3ZAP6                                 |
| A0A504X3J8         | E9B0M6                   | A0A1E1J0Y4           |                                          | A4I1M5                               | A0A3P3ZG54                                 |
| E9BMF8             | A0A1E1IUI9               | A0A640KYQ2           |                                          | E9ATX7                               | A0A088S266                                 |
| A0A504X1P4         | A0A640KE76               | A0A640KG80           |                                          | E9AFL3                               | E9ANP4                                     |
| Q4Q4X1             |                          | A0A640KDZ6           |                                          | A0A1E1IXW5                           | A0A640KEQ1                                 |
| A0A504XR61         |                          | A0A088RW67           |                                          |                                      |                                            |
| A0A504XGG4         |                          | A4HD14               |                                          |                                      |                                            |
| A0A3Q8IHF4         |                          | A0A088RR95           |                                          |                                      |                                            |
| Q4Q5I2             |                          | A0A640KVG1           |                                          |                                      |                                            |
| A0A504XY66         |                          | A0A1E1IVQ5           |                                          |                                      |                                            |
| A0A504X5D8         |                          | E9B1E2               |                                          |                                      |                                            |
| E9ACH4             |                          | A0A4D5YJB0           |                                          |                                      |                                            |
| E9AGY8             |                          | A0A640KIC6           |                                          |                                      |                                            |
| A4I4H4             |                          | A4HB65               |                                          |                                      |                                            |
| A0A504YBN6         |                          | A0A3P3YYV3           |                                          |                                      |                                            |
| A0A6J8FEJ1         |                          | TXN2                 |                                          |                                      |                                            |
| A0A6J8FLI6         |                          | A0A640KGF0           |                                          |                                      |                                            |
| A0A640KLW3         |                          | A0A640KH80           |                                          |                                      |                                            |
| A4HS73             |                          | PRO-1                |                                          |                                      |                                            |
| A0A6J8FHZ9         |                          |                      |                                          |                                      |                                            |
| A1Y2D3             |                          |                      |                                          |                                      |                                            |
| E9B9B7             |                          |                      |                                          |                                      |                                            |
| Q4QC13             |                          |                      |                                          |                                      |                                            |
| E9B1E6             |                          |                      |                                          |                                      |                                            |
| Q4QJ42             |                          |                      |                                          |                                      |                                            |
| A4I2X5             |                          |                      |                                          |                                      |                                            |
| A0A504XFE0         |                          |                      |                                          |                                      |                                            |
| A0A6L0Y0Y0         |                          |                      |                                          |                                      |                                            |
| A4I5Z0             |                          |                      |                                          |                                      |                                            |
| A0A504WZF6         |                          |                      |                                          |                                      |                                            |
| A0A3Q8IVV7         |                          |                      |                                          |                                      |                                            |
| A0A3Q8ICH6         |                          |                      |                                          |                                      |                                            |
| E9BUW8             |                          |                      |                                          |                                      |                                            |
| E9BV86             |                          |                      |                                          |                                      |                                            |
| A0A504X8W9         |                          |                      |                                          |                                      |                                            |
